# Supplementary material for: Incorporation of W6+ into hematite (α-Fe2O3) in the form of ferberite nanolamellae
Source: Copernicus journal article supplement (doi:10.5194/ejm-37-101-2025), 2025-02-25
Supplement: Supplementary file 1 [file ejm-37-101-2025-supplement.pdf]

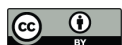

*Supplement of*

## **Incorporation of $W^{6+}$ into hematite ( $\alpha\text{-Fe}_2\text{O}_3$ ) in the form of ferberite nanolamellae**

**Juraj Majzlan et al.**

*Correspondence to:* Juraj Majzlan ([juraj.majzlan@uni-jena.de](mailto:juraj.majzlan@uni-jena.de))

The copyright of individual parts of the supplement might differ from the article licence.

Table S1. Electron microprobe analyses of hematite from Hodruša. All values in weight %.

| Point | Al <sub>2</sub> O <sub>3</sub> | WO <sub>3</sub> | Fe <sub>2</sub> O <sub>3</sub> | total | Point | Al <sub>2</sub> O <sub>3</sub> | WO <sub>3</sub> | Fe <sub>2</sub> O <sub>3</sub> | total  |
|-------|--------------------------------|-----------------|--------------------------------|-------|-------|--------------------------------|-----------------|--------------------------------|--------|
| 1     | 0.07                           | 3.96            | 95.52                          | 99.55 | 2     | 0.07                           | 3.23            | 96.51                          | 99.80  |
| 3     | 0.08                           | 3.06            | 96.78                          | 99.92 | 4     | 0.05                           | 3.33            | 96.49                          | 99.88  |
| 5     | 0.08                           | 1.99            | 97.35                          | 99.42 | 6     | 0.03                           | 2.76            | 96.98                          | 99.77  |
| 7     | 0.08                           | 3.68            | 96.06                          | 99.83 | 8     | 0.09                           | 3.22            | 95.81                          | 99.12  |
| 9     | 0.06                           | 3.75            | 95.56                          | 99.37 | 10    | 0.08                           | 3.72            | 95.99                          | 99.79  |
| 11    | 0.05                           | 2.71            | 97.04                          | 99.79 | 12    | 0.06                           | 3.48            | 96.36                          | 99.91  |
| 13    | 0.07                           | 3.13            | 96.28                          | 99.47 | 14    | 0.07                           | 3.76            | 95.93                          | 99.77  |
| 15    | 0.10                           | 3.91            | 95.73                          | 99.74 | 16    | 0.09                           | 3.93            | 96.08                          | 100.10 |
| 17    | 0.10                           | 4.67            | 94.85                          | 99.62 | 18    | 0.17                           | 4.31            | 94.86                          | 99.35  |
| 19    | 0.10                           | 4.70            | 94.95                          | 99.76 | 20    | 0.13                           | 3.83            | 95.66                          | 99.62  |
| 21    | 1.24                           | 0.33            | 98.21                          | 99.78 | 22    | 1.57                           | 0.12            | 97.91                          | 99.60  |
| 23    | 1.46                           | 0.18            | 97.89                          | 99.54 | 24    | 1.17                           | 0.27            | 98.22                          | 99.66  |
| 25    | 1.02                           | 0.28            | 98.41                          | 99.71 | 26    | 1.00                           | 0.40            | 98.55                          | 99.96  |
| 27    | 1.64                           | 0.21            | 98.01                          | 99.85 | 28    | 0.78                           | 0.27            | 98.98                          | 100.03 |
| 29    | 1.19                           | 0.26            | 98.02                          | 99.48 | 30    | 0.21                           | 0.61            | 98.28                          | 99.10  |
| 31    | 0.30                           | 0.65            | 97.98                          | 98.94 | 32    | 0.30                           | 0.42            | 99.27                          | 99.98  |
| 33    | 0.42                           | 0.52            | 98.22                          | 99.16 | 34    | 0.28                           | 0.54            | 99.14                          | 99.96  |
| 35    | 0.16                           | 0.77            | 98.74                          | 99.66 | 36    | 0.09                           | 0.29            | 99.18                          | 99.56  |
| 37    | 0.10                           | 0.51            | 98.92                          | 99.53 | 38    | 0.09                           | 0.68            | 98.69                          | 99.46  |
| 39    | 0.31                           | 0.63            | 98.71                          | 99.65 | 40    | 0.35                           | 0.33            | 98.81                          | 99.49  |
| 41    | 0.08                           | 3.11            | 96.48                          | 99.67 | 42    | 0.05                           | 2.19            | 97.18                          | 99.43  |
| 43    | 0.07                           | 3.25            | 95.98                          | 99.31 | 44    | 0.05                           | 2.57            | 96.58                          | 99.21  |
| 45    | 0.04                           | 3.01            | 95.92                          | 98.98 | 46    | 0.09                           | 3.81            | 95.88                          | 99.78  |
| 47    | 0.06                           | 3.56            | 95.75                          | 99.37 | 48    | 0.19                           | 3.53            | 95.55                          | 99.27  |
| 49    | 0.19                           | 3.40            | 95.73                          | 99.33 | 50    | 0.19                           | 3.51            | 95.69                          | 99.39  |
| 51    | 0.17                           | 3.39            | 95.62                          | 99.18 | 52    | 0.15                           | 3.13            | 96.44                          | 99.71  |
| 53    | 0.19                           | 3.48            | 95.43                          | 99.10 | 54    | 0.17                           | 3.44            | 95.73                          | 99.35  |
| 55    | 0.21                           | 3.59            | 95.73                          | 99.54 | 56    | 0.18                           | 3.47            | 95.28                          | 98.93  |
| 57    | 0.16                           | 3.40            | 95.22                          | 98.79 | 58    | 0.15                           | 3.78            | 95.58                          | 99.51  |
| 59    | 0.21                           | 3.38            | 95.48                          | 99.07 | 60    | 0.16                           | 3.59            | 95.42                          | 99.17  |
| 61    | 0.22                           | 3.28            | 95.56                          | 99.06 | 62    | 0.11                           | 3.77            | 95.72                          | 99.60  |
| 63    | 0.16                           | 3.54            | 95.58                          | 99.28 | 64    | 0.13                           | 3.52            | 96.15                          | 99.80  |
| 65    | 0.11                           | 3.68            | 95.72                          | 99.51 | 66    | 0.14                           | 3.57            | 95.78                          | 99.49  |
| 67    | 0.10                           | 2.89            | 96.25                          | 99.24 | 68    | 0.16                           | 3.40            | 95.88                          | 99.44  |
| 69    | 0.17                           | 3.37            | 96.01                          | 99.54 | 70    | 0.14                           | 3.47            | 95.68                          | 99.29  |
| 71    | 0.08                           | 3.56            | 95.81                          | 99.44 | 72    | 0.06                           | 2.50            | 96.88                          | 99.43  |
| 73    | 0.14                           | 3.11            | 96.22                          | 99.48 | 74    | 0.13                           | 3.22            | 95.99                          | 99.34  |
| 75    | 0.09                           | 3.34            | 95.88                          | 99.31 | 76    | 0.12                           | 3.77            | 95.88                          | 99.77  |
| 77    | 0.13                           | 3.24            | 95.82                          | 99.19 | 78    | 0.07                           | 2.90            | 96.38                          | 99.35  |
| 79    | 0.13                           | 3.40            | 95.66                          | 99.20 | 80    | 0.10                           | 3.10            | 95.85                          | 99.05  |
| 81    | 0.07                           | 0.92            | 98.35                          | 99.34 | 82    | 0.33                           | 0.53            | 98.37                          | 99.22  |
| 83    | 0.48                           | 0.64            | 98.02                          | 99.14 | 84    | 0.06                           | 0.57            | 98.27                          | 98.90  |
| 85    | 0.12                           | 0.53            | 98.54                          | 99.19 | 86    | 0.14                           | 0.71            | 98.52                          | 99.38  |
| 87    | 0.10                           | 0.68            | 98.55                          | 99.33 | 88    | 0.21                           | 0.73            | 98.52                          | 99.47  |

Table S2. continued.

| Point | Al <sub>2</sub> O <sub>3</sub> | WO <sub>3</sub> | Fe <sub>2</sub> O <sub>3</sub> | total | Point | Al <sub>2</sub> O <sub>3</sub> | WO <sub>3</sub> | Fe <sub>2</sub> O <sub>3</sub> | total  |
|-------|--------------------------------|-----------------|--------------------------------|-------|-------|--------------------------------|-----------------|--------------------------------|--------|
| 89    | 0.14                           | 0.60            | 98.68                          | 99.42 | 90    | 0.08                           | 1.26            | 97.92                          | 99.26  |
| 91    | 0.10                           | 0.67            | 98.61                          | 99.38 | 92    | 0.10                           | 0.53            | 98.47                          | 99.10  |
| 93    | 0.11                           | 0.94            | 98.55                          | 99.60 | 94    | 0.15                           | 0.93            | 98.29                          | 99.38  |
| 95    | 0.27                           | 0.47            | 98.44                          | 99.18 | 96    | 0.18                           | 0.51            | 98.45                          | 99.14  |
| 97    | 0.13                           | 0.88            | 98.35                          | 99.36 | 98    | 0.32                           | 0.55            | 98.48                          | 99.35  |
| 99    | 0.11                           | 0.60            | 98.61                          | 99.32 | 100   | 0.11                           | 0.61            | 98.88                          | 99.60  |
| 101   | 0.10                           | 0.73            | 98.24                          | 99.07 | 102   | 0.10                           | 0.47            | 98.78                          | 99.35  |
| 103   | 0.07                           | 0.89            | 98.57                          | 99.53 | 104   | 0.14                           | 0.71            | 98.39                          | 99.24  |
| 105   | 0.20                           | 0.47            | 98.69                          | 99.36 | 106   | 0.08                           | 0.46            | 98.88                          | 99.41  |
| 107   | 0.16                           | 0.55            | 98.91                          | 99.62 | 108   | 0.09                           | 0.49            | 99.02                          | 99.60  |
| 109   | 0.23                           | 0.43            | 98.65                          | 99.31 | 110   | 0.73                           | 0.40            | 98.42                          | 99.55  |
| 111   | 1.00                           | 0.44            | 97.85                          | 99.29 | 112   | 1.16                           | 0.21            | 97.97                          | 99.33  |
| 113   | 0.77                           | 0.29            | 97.94                          | 98.99 | 114   | 1.15                           | 0.21            | 98.08                          | 99.44  |
| 115   | 1.43                           | 0.22            | 97.44                          | 99.09 | 116   | 0.99                           | 0.07            | 94.32                          | 95.38  |
| 117   | 1.46                           | 0.18            | 96.91                          | 98.54 | 118   | 1.12                           | 0.25            | 98.04                          | 99.41  |
| 119   | 1.75                           | 0.16            | 93.79                          | 95.70 | 120   | 0.08                           | 3.24            | 96.02                          | 99.34  |
| 121   | 0.13                           | 3.38            | 96.22                          | 99.73 | 122   | 0.06                           | 3.09            | 96.55                          | 99.70  |
| 123   | 0.13                           | 3.23            | 96.36                          | 99.73 | 124   | 0.14                           | 3.62            | 95.82                          | 99.58  |
| 125   | 0.16                           | 3.62            | 95.59                          | 99.37 | 126   | 0.12                           | 3.52            | 96.03                          | 99.67  |
| 127   | 0.10                           | 3.64            | 95.85                          | 99.59 | 128   | 0.13                           | 3.47            | 96.14                          | 99.73  |
| 129   | 0.15                           | 3.48            | 95.63                          | 99.26 | 130   | 0.18                           | 3.38            | 95.92                          | 99.48  |
| 131   | 0.11                           | 3.34            | 95.79                          | 99.25 | 132   | 0.10                           | 3.80            | 95.61                          | 99.50  |
| 133   | 0.09                           | 3.27            | 95.99                          | 99.35 | 134   | 0.11                           | 3.54            | 95.81                          | 99.46  |
| 135   | 0.09                           | 3.57            | 96.06                          | 99.72 | 136   | 0.09                           | 3.62            | 96.08                          | 99.78  |
| 137   | 0.20                           | 3.20            | 96.09                          | 99.50 | 138   | 0.07                           | 3.24            | 96.54                          | 99.85  |
| 139   | 0.07                           | 2.79            | 96.81                          | 99.66 | 140   | 0.07                           | 2.62            | 97.02                          | 99.72  |
| 141   | 0.18                           | 3.57            | 96.12                          | 99.87 | 142   | 0.12                           | 3.77            | 95.76                          | 99.66  |
| 143   | 0.16                           | 3.39            | 96.24                          | 99.79 | 144   | 0.19                           | 3.76            | 95.52                          | 99.47  |
| 145   | 0.20                           | 3.78            | 95.88                          | 99.86 | 146   | 0.12                           | 3.95            | 95.12                          | 99.18  |
| 147   | 0.15                           | 3.82            | 95.53                          | 99.51 | 148   | 0.13                           | 3.86            | 95.63                          | 99.63  |
| 149   | 0.09                           | 3.96            | 95.76                          | 99.82 | 150   | 0.09                           | 3.81            | 95.71                          | 99.60  |
| 151   | 0.21                           | 4.04            | 95.45                          | 99.70 | 152   | 0.21                           | 3.68            | 95.56                          | 99.46  |
| 153   | 0.20                           | 3.48            | 95.91                          | 99.59 | 154   | 0.19                           | 3.67            | 95.92                          | 99.78  |
| 155   | 0.23                           | 3.72            | 95.61                          | 99.56 | 156   | 0.19                           | 3.82            | 95.86                          | 99.88  |
| 157   | 0.11                           | 3.33            | 96.39                          | 99.83 | 158   | 0.04                           | 2.46            | 97.52                          | 100.02 |
| 159   | 0.08                           | 3.87            | 95.93                          | 99.89 | 160   | 0.15                           | 3.39            | 95.83                          | 99.38  |
| 161   | 1.26                           | 0.58            | 97.76                          | 99.61 | 162   | 0.20                           | 0.65            | 98.81                          | 99.66  |
| 163   | 1.24                           | 0.51            | 98.24                          | 99.99 | 164   | 1.01                           | 0.44            | 98.31                          | 99.76  |
| 165   | 1.41                           | 0.36            | 97.65                          | 99.42 | 166   | 0.66                           | 0.51            | 98.02                          | 99.20  |
| 167   | 1.58                           | 0.28            | 97.31                          | 99.16 | 168   | 0.58                           | 0.54            | 98.69                          | 99.81  |
| 169   | 0.83                           | 0.48            | 98.62                          | 99.93 | 170   | 0.45                           | 0.43            | 98.98                          | 99.86  |
| 171   | 0.71                           | 0.40            | 98.45                          | 99.56 | 172   | 0.13                           | 0.41            | 99.14                          | 99.68  |
| 173   | 0.06                           | 1.20            | 98.64                          | 99.90 | 174   | 1.49                           | 0.35            | 97.75                          | 99.58  |
| 175   | 1.47                           | 0.48            | 97.56                          | 99.52 | 176   | 1.69                           | 0.26            | 97.39                          | 99.34  |

Table S2. continued.

| Point | Al <sub>2</sub> O <sub>3</sub> | WO <sub>3</sub> | Fe <sub>2</sub> O <sub>3</sub> | total  | Point | Al <sub>2</sub> O <sub>3</sub> | WO <sub>3</sub> | Fe <sub>2</sub> O <sub>3</sub> | total  |
|-------|--------------------------------|-----------------|--------------------------------|--------|-------|--------------------------------|-----------------|--------------------------------|--------|
| 177   | 1.49                           | 0.40            | 98.02                          | 99.91  | 178   | 1.82                           | 0.16            | 97.91                          | 99.88  |
| 179   | 1.39                           | 0.55            | 96.46                          | 98.40  | 180   | 1.61                           | 0.43            | 97.12                          | 99.17  |
| 181   | 1.55                           | 0.51            | 97.58                          | 99.64  | 182   | 1.58                           | 0.47            | 97.21                          | 99.26  |
| 183   | 1.73                           | 0.36            | 97.32                          | 99.41  | 184   | 1.70                           | 0.38            | 97.29                          | 99.37  |
| 185   | 2.02                           | 0.13            | 97.39                          | 99.54  | 186   | 1.95                           | 0.18            | 97.11                          | 99.23  |
| 187   | 1.86                           | 0.15            | 97.42                          | 99.43  | 188   | 1.95                           | 0.18            | 97.15                          | 99.27  |
| 189   | 2.00                           | 0.16            | 97.84                          | 100.00 | 190   | 1.97                           | 0.14            | 97.48                          | 99.59  |
| 191   | 1.37                           | 0.16            | 97.66                          | 99.20  | 192   | 0.98                           | 0.21            | 98.37                          | 99.56  |
| 193   | 1.29                           | 0.31            | 97.97                          | 99.57  | 194   | 0.92                           | 0.45            | 98.24                          | 99.61  |
| 195   | 1.27                           | 0.28            | 97.72                          | 99.27  | 196   | 1.32                           | 0.25            | 97.74                          | 99.31  |
| 197   | 1.24                           | 0.12            | 97.92                          | 99.28  | 198   | 1.20                           | 0.10            | 98.41                          | 99.70  |
| 199   | 1.09                           | 0.37            | 97.92                          | 99.38  | 200   | 0.97                           | 0.26            | 98.35                          | 99.58  |
| 201   | 0.13                           | 3.28            | 96.18                          | 99.58  | 202   | 0.14                           | 3.54            | 95.89                          | 99.58  |
| 203   | 0.12                           | 3.77            | 96.01                          | 99.90  | 204   | 0.13                           | 3.86            | 95.92                          | 99.91  |
| 205   | 0.11                           | 3.54            | 96.42                          | 100.08 | 206   | 0.09                           | 3.77            | 95.85                          | 99.71  |
| 207   | 0.13                           | 3.75            | 95.88                          | 99.75  | 208   | 0.10                           | 3.61            | 95.93                          | 99.64  |
| 209   | 0.08                           | 3.58            | 96.01                          | 99.66  | 210   | 0.18                           | 3.85            | 95.36                          | 99.39  |
| 211   | 0.17                           | 3.72            | 95.92                          | 99.81  | 212   | 0.16                           | 3.69            | 95.11                          | 98.96  |
| 213   | 0.19                           | 3.52            | 96.12                          | 99.83  | 214   | 0.25                           | 3.08            | 95.86                          | 99.19  |
| 215   | 0.08                           | 3.37            | 96.36                          | 99.81  | 216   | 0.06                           | 2.96            | 97.08                          | 100.10 |
| 217   | 0.07                           | 2.69            | 97.05                          | 99.80  | 218   | 0.05                           | 3.01            | 96.81                          | 99.88  |
| 219   | 0.05                           | 3.62            | 95.82                          | 99.49  | 220   | 0.06                           | 4.15            | 96.11                          | 100.31 |
| 221   | 0.42                           | 0.35            | 98.68                          | 99.45  | 222   | 1.14                           | 0.35            | 97.99                          | 99.49  |
| 223   | 1.37                           | 0.53            | 97.68                          | 99.58  | 224   | 1.20                           | 0.54            | 97.76                          | 99.51  |
| 225   | 0.76                           | 0.59            | 98.75                          | 100.10 | 226   | 1.29                           | 0.29            | 97.98                          | 99.56  |
| 227   | 1.10                           | 0.19            | 98.39                          | 99.68  | 228   | 1.29                           | 0.24            | 98.35                          | 99.89  |
| 229   | 0.85                           | 0.33            | 98.88                          | 100.06 | 230   | 1.15                           | 0.02            | 98.12                          | 99.30  |
| 231   | 0.53                           | 0.33            | 98.82                          | 99.69  | 232   | 1.05                           | 0.26            | 98.15                          | 99.46  |
| 233   | 1.27                           | 0.24            | 97.86                          | 99.37  | 234   | 0.36                           | 0.47            | 98.75                          | 99.58  |
| 235   | 1.09                           | 0.24            | 98.04                          | 99.36  | 236   | 1.04                           | 0.13            | 98.51                          | 99.67  |
| 237   | 0.47                           | 0.58            | 98.47                          | 99.52  | 238   | 1.57                           | 0.06            | 98.11                          | 99.74  |
| 239   | 1.26                           | 0.28            | 97.82                          | 99.36  | 240   | 1.22                           | 0.61            | 97.14                          | 98.97  |
| 241   | 0.09                           | 3.77            | 95.61                          | 99.47  | 242   | 0.08                           | 3.78            | 96.18                          | 100.04 |
| 243   | 0.07                           | 4.10            | 95.43                          | 99.61  | 244   | 0.10                           | 3.37            | 96.36                          | 99.83  |
| 245   | 0.12                           | 3.47            | 96.69                          | 100.28 | 246   | 0.09                           | 3.54            | 95.89                          | 99.53  |
| 247   | 0.07                           | 3.22            | 96.24                          | 99.52  | 248   | 0.08                           | 3.47            | 95.71                          | 99.26  |
| 249   | 0.40                           | 1.00            | 97.76                          | 99.17  | 250   | 0.04                           | 2.60            | 97.06                          | 99.70  |
| 251   | 0.07                           | 3.17            | 96.46                          | 99.70  | 252   | 0.07                           | 2.52            | 97.48                          | 100.07 |
| 253   | 0.05                           | 2.81            | 96.64                          | 99.50  | 254   | 0.08                           | 3.59            | 96.08                          | 99.75  |
| 255   | 0.03                           | 3.30            | 96.16                          | 99.50  | 256   | 0.03                           | 2.08            | 97.02                          | 99.13  |
| 257   | 0.25                           | 3.86            | 95.36                          | 99.47  | 258   | 0.09                           | 3.48            | 95.61                          | 99.17  |
| 259   | 0.15                           | 3.58            | 95.72                          | 99.45  | 260   | 0.11                           | 3.49            | 96.06                          | 99.66  |
| 261   | 1.39                           | 0.64            | 96.54                          | 98.56  | 262   | 1.51                           | 0.54            | 96.34                          | 98.39  |
| 263   | 1.14                           | 0.91            | 97.12                          | 99.17  | 264   | 1.05                           | 0.80            | 97.76                          | 99.61  |

Table S2. continued.

| Point | Al <sub>2</sub> O <sub>3</sub> | WO <sub>3</sub> | Fe <sub>2</sub> O <sub>3</sub> | total  | Point | Al <sub>2</sub> O <sub>3</sub> | WO <sub>3</sub> | Fe <sub>2</sub> O <sub>3</sub> | total  |
|-------|--------------------------------|-----------------|--------------------------------|--------|-------|--------------------------------|-----------------|--------------------------------|--------|
| 265   | 0.20                           | 0.62            | 98.81                          | 99.63  | 266   | 0.46                           | 0.78            | 98.47                          | 99.71  |
| 267   | 1.55                           | 0.58            | 96.99                          | 99.13  | 268   | 0.42                           | 0.80            | 98.34                          | 99.56  |
| 269   | 0.15                           | 0.62            | 98.71                          | 99.48  | 270   | 1.49                           | 0.68            | 97.38                          | 99.55  |
| 271   | 0.16                           | 0.42            | 99.08                          | 99.66  | 272   | 0.62                           | 0.58            | 98.32                          | 99.52  |
| 273   | 1.62                           | 0.41            | 97.62                          | 99.65  | 274   | 0.89                           | 0.51            | 98.12                          | 99.52  |
| 275   | 0.76                           | 0.48            | 98.15                          | 99.39  | 276   | 1.02                           | 0.40            | 98.34                          | 99.75  |
| 277   | 1.26                           | 0.26            | 97.85                          | 99.37  | 278   | 1.10                           | 0.52            | 97.88                          | 99.50  |
| 279   | 1.49                           | 0.43            | 97.55                          | 99.47  | 280   | 1.86                           | 0.14            | 97.52                          | 99.52  |
| 281   | 0.04                           | 2.96            | 96.94                          | 99.94  | 282   | 0.09                           | 3.62            | 95.93                          | 99.64  |
| 283   | 0.04                           | 1.89            | 97.69                          | 99.63  | 284   | 0.08                           | 3.75            | 96.39                          | 100.21 |
| 285   | 0.08                           | 3.64            | 96.25                          | 99.97  | 286   | 0.10                           | 3.09            | 96.82                          | 100.01 |
| 287   | 0.09                           | 3.95            | 95.52                          | 99.56  | 288   | 0.08                           | 3.72            | 96.16                          | 99.96  |
| 289   | 0.06                           | 2.60            | 97.06                          | 99.72  | 290   | 0.07                           | 2.91            | 97.31                          | 100.29 |
| 291   | 0.11                           | 3.52            | 95.83                          | 99.46  | 292   | 0.09                           | 3.10            | 96.45                          | 99.64  |
| 293   | 0.08                           | 2.85            | 97.15                          | 100.08 | 294   | 0.04                           | 3.13            | 96.51                          | 99.67  |
| 295   | 0.06                           | 2.82            | 97.09                          | 99.98  | 296   | 0.08                           | 3.69            | 95.98                          | 99.75  |
| 297   | 0.10                           | 3.85            | 95.98                          | 99.92  | 298   | 0.12                           | 3.68            | 95.71                          | 99.51  |
| 299   | 0.09                           | 3.80            | 95.93                          | 99.82  | 300   | 0.13                           | 3.91            | 95.58                          | 99.61  |
| 301   | 0.14                           | 3.47            | 95.92                          | 99.53  | 302   | 0.09                           | 3.01            | 96.81                          | 99.91  |
| 303   | 0.09                           | 3.33            | 96.46                          | 99.89  | 304   | 0.06                           | 2.88            | 97.42                          | 100.35 |
| 305   | 0.07                           | 2.33            | 97.34                          | 99.74  | 306   | 0.10                           | 3.04            | 96.58                          | 99.71  |
| 307   | 0.08                           | 2.82            | 97.15                          | 100.05 | 308   | 0.07                           | 3.61            | 96.38                          | 100.06 |
| 309   | 0.08                           | 3.40            | 96.45                          | 99.93  | 310   | 0.09                           | 3.47            | 96.19                          | 99.75  |
| 311   | 0.39                           | 0.47            | 98.69                          | 99.55  | 312   | 1.01                           | 0.54            | 98.61                          | 100.15 |
| 313   | 1.14                           | 0.25            | 98.31                          | 99.70  | 314   | 0.45                           | 0.69            | 98.72                          | 99.87  |
| 315   | 1.53                           | 0.19            | 97.56                          | 99.29  | 316   | 1.72                           | 0.20            | 97.81                          | 99.72  |
| 317   | 1.47                           | 0.13            | 97.94                          | 99.53  | 318   | 1.73                           | 0.18            | 97.75                          | 99.65  |
| 319   | 1.34                           | 0.42            | 97.91                          | 99.66  | 320   | 0.63                           | 0.51            | 98.69                          | 99.84  |
| 321   | 0.48                           | 0.65            | 98.32                          | 99.45  | 322   | 0.28                           | 0.80            | 98.52                          | 99.60  |
| 323   | 0.92                           | 0.79            | 98.24                          | 99.95  | 324   | 0.03                           | 0.92            | 98.91                          | 99.86  |
| 325   | 0.06                           | 0.53            | 99.12                          | 99.72  | 326   | 0.74                           | 0.47            | 98.85                          | 100.06 |
| 327   | 0.68                           | 0.41            | 98.75                          | 99.85  | 328   | 0.47                           | 0.42            | 98.55                          | 99.44  |
| 329   | 0.86                           | 0.60            | 98.54                          | 100.00 | 330   | 1.31                           | 0.39            | 98.05                          | 99.75  |
| 331   | 0.08                           | 2.02            | 97.86                          | 99.97  | 332   | 0.04                           | 2.81            | 96.85                          | 99.71  |
| 333   | 0.09                           | 3.04            | 96.89                          | 100.02 | 334   | 0.06                           | 2.85            | 96.82                          | 99.74  |
| 335   | 0.11                           | 3.90            | 95.38                          | 99.38  | 336   | 0.11                           | 3.88            | 96.25                          | 100.25 |
| 337   | 0.14                           | 3.75            | 95.29                          | 99.18  | 338   | 0.14                           | 3.54            | 96.42                          | 100.10 |
| 339   | 0.20                           | 3.44            | 96.19                          | 99.84  | 340   | 0.25                           | 3.42            | 95.55                          | 99.22  |
| 341   | 0.07                           | 2.64            | 97.16                          | 99.87  | 342   | 0.17                           | 3.71            | 95.82                          | 99.70  |
| 343   | 0.16                           | 3.73            | 95.93                          | 99.82  | 344   | 0.06                           | 3.30            | 96.66                          | 100.03 |
| 345   | 0.05                           | 3.82            | 96.02                          | 99.90  | 346   | 0.05                           | 3.49            | 96.28                          | 99.82  |
| 347   | 0.06                           | 3.80            | 96.61                          | 100.46 | 348   | 0.04                           | 3.38            | 96.51                          | 99.93  |
| 349   | 0.02                           | 2.66            | 97.08                          | 99.76  | 350   | 0.05                           | 4.19            | 95.71                          | 99.95  |
| 351   | 0.97                           | 0.19            | 98.09                          | 99.25  | 352   | 1.66                           | 0.20            | 97.55                          | 99.41  |

Table S2. continued.

| Point | Al <sub>2</sub> O <sub>3</sub> | WO <sub>3</sub> | Fe <sub>2</sub> O <sub>3</sub> | total  | Point | Al <sub>2</sub> O <sub>3</sub> | WO <sub>3</sub> | Fe <sub>2</sub> O <sub>3</sub> | total  |
|-------|--------------------------------|-----------------|--------------------------------|--------|-------|--------------------------------|-----------------|--------------------------------|--------|
| 353   | 1.23                           | 0.21            | 98.17                          | 99.60  | 354   | 1.25                           | 0.26            | 98.09                          | 99.61  |
| 355   | 1.00                           | 0.36            | 98.99                          | 100.35 | 356   | 0.19                           | 0.28            | 99.19                          | 99.66  |
| 357   | 0.18                           | 0.67            | 98.72                          | 99.58  | 358   | 0.80                           | 0.29            | 98.38                          | 99.47  |
| 359   | 0.50                           | 0.23            | 98.82                          | 99.56  | 360   | 1.33                           | 0.11            | 98.37                          | 99.81  |
| 361   | 0.89                           | 0.16            | 98.58                          | 99.63  | 362   | 0.99                           | 0.29            | 98.61                          | 99.88  |
| 363   | 0.84                           | 0.32            | 98.72                          | 99.88  | 364   | 0.51                           | 0.26            | 99.07                          | 99.84  |
| 365   | 1.51                           | 0.15            | 98.07                          | 99.73  | 366   | 1.68                           | 0.24            | 97.62                          | 99.54  |
| 367   | 1.59                           | 0.21            | 97.85                          | 99.65  | 368   | 1.45                           | 0.19            | 98.04                          | 99.68  |
| 369   | 1.55                           | 0.16            | 97.88                          | 99.60  | 370   | 1.07                           | 0.33            | 98.07                          | 99.46  |
| 371   | 0.10                           | 3.32            | 96.59                          | 100.01 | 372   | 0.06                           | 2.75            | 97.25                          | 100.06 |
| 373   | 0.23                           | 3.42            | 96.72                          | 100.37 | 374   | 0.04                           | 2.79            | 97.49                          | 100.32 |
| 375   | 0.14                           | 3.30            | 96.66                          | 100.11 | 376   | 0.12                           | 3.06            | 96.62                          | 99.80  |
| 377   | 0.27                           | 3.63            | 96.41                          | 100.31 | 378   | 0.15                           | 3.04            | 96.76                          | 99.96  |
| 379   | 0.07                           | 2.90            | 97.08                          | 100.05 | 380   | 0.05                           | 0.58            | 99.18                          | 99.81  |
| 381   | 0.03                           | 2.17            | 97.61                          | 99.81  | 382   | 0.03                           | 1.82            | 98.42                          | 100.27 |
| 383   | 0.08                           | 2.90            | 96.79                          | 99.77  | 384   | 0.07                           | 2.16            | 97.68                          | 99.91  |
| 385   | 0.06                           | 2.80            | 97.26                          | 100.12 | 386   | 1.42                           | 0.25            | 98.07                          | 99.73  |
| 387   | 1.36                           | 0.31            | 98.32                          | 100.00 | 388   | 1.56                           | 0.46            | 98.02                          | 100.04 |
| 389   | 1.27                           | 0.18            | 98.15                          | 99.60  | 390   | 1.37                           | 0.40            | 98.32                          | 100.10 |
| 391   | 1.58                           | 0.32            | 98.41                          | 100.31 | 392   | 1.35                           | 0.49            | 98.38                          | 100.22 |
| 393   | 1.82                           | 0.34            | 97.66                          | 99.82  | 394   | 1.32                           | 0.40            | 98.07                          | 99.79  |
| 395   | 0.55                           | 0.59            | 98.87                          | 100.00 | 396   | 0.61                           | 0.68            | 99.14                          | 100.43 |
| 397   | 0.51                           | 0.52            | 99.12                          | 100.16 | 398   | 0.88                           | 0.76            | 98.49                          | 100.13 |
| 399   | 1.25                           | 0.42            | 98.35                          | 100.02 | 400   | 0.70                           | 0.58            | 98.74                          | 100.02 |
| 401   | 0.05                           | 3.78            | 96.02                          | 99.85  | 402   | 0.05                           | 2.01            | 97.42                          | 99.47  |
| 403   | 0.06                           | 3.52            | 96.14                          | 99.71  | 404   | 0.10                           | 3.80            | 95.49                          | 99.38  |
| 405   | 0.08                           | 3.46            | 96.08                          | 99.61  | 406   | 0.07                           | 3.67            | 95.79                          | 99.53  |
| 407   | 0.12                           | 3.83            | 95.88                          | 99.83  | 408   | 0.07                           | 3.85            | 95.75                          | 99.66  |
| 409   | 0.08                           | 4.28            | 95.53                          | 99.89  | 410   | 0.07                           | 4.67            | 94.98                          | 99.71  |
| 411   | 0.08                           | 4.54            | 95.28                          | 99.89  | 412   | 0.09                           | 4.69            | 94.93                          | 99.72  |
| 413   | 0.09                           | 4.63            | 95.09                          | 99.81  | 414   | 0.08                           | 4.60            | 95.53                          | 100.21 |
| 415   | 0.03                           | 2.99            | 96.18                          | 99.20  | 416   | 0.04                           | 2.95            | 96.56                          | 99.55  |
| 417   | 0.09                           | 4.59            | 95.19                          | 99.87  | 418   | 0.06                           | 2.88            | 96.98                          | 99.91  |
| 419   | 0.17                           | 3.76            | 95.59                          | 99.52  | 420   | 0.18                           | 3.66            | 95.96                          | 99.80  |
| 421   | 1.72                           | 0.73            | 97.49                          | 99.94  | 422   | 0.06                           | 3.06            | 97.12                          | 100.25 |
| 423   | 0.07                           | 4.70            | 94.63                          | 99.40  | 424   | 0.09                           | 4.17            | 95.36                          | 99.62  |
| 425   | 0.14                           | 4.04            | 95.36                          | 99.54  | 426   | 0.14                           | 4.35            | 95.08                          | 99.56  |
| 427   | 0.14                           | 3.82            | 95.73                          | 99.70  | 428   | 0.13                           | 4.07            | 95.58                          | 99.78  |
| 429   | 0.10                           | 3.80            | 95.85                          | 99.75  | 430   | 0.09                           | 4.09            | 95.72                          | 99.90  |
| 431   | 0.14                           | 3.93            | 95.72                          | 99.79  | 432   | 0.19                           | 3.76            | 95.13                          | 99.08  |
| 433   | 0.18                           | 3.37            | 95.55                          | 99.10  | 434   | 0.10                           | 4.19            | 95.01                          | 99.29  |
| 435   | 0.11                           | 4.44            | 95.79                          | 100.34 | 436   | 0.10                           | 3.95            | 95.61                          | 99.65  |
| 437   | 0.11                           | 3.93            | 95.78                          | 99.82  | 438   | 0.07                           | 4.48            | 94.82                          | 99.37  |
| 439   | 0.11                           | 4.34            | 95.36                          | 99.81  | 440   | 0.09                           | 4.33            | 95.06                          | 99.48  |

Table S2. continued.

| Point | Al <sub>2</sub> O <sub>3</sub> | WO <sub>3</sub> | Fe <sub>2</sub> O <sub>3</sub> | total  | Point | Al <sub>2</sub> O <sub>3</sub> | WO <sub>3</sub> | Fe <sub>2</sub> O <sub>3</sub> | total  |
|-------|--------------------------------|-----------------|--------------------------------|--------|-------|--------------------------------|-----------------|--------------------------------|--------|
| 441   | 0.11                           | 4.57            | 95.22                          | 99.90  | 442   | 0.05                           | 3.75            | 95.66                          | 99.46  |
| 443   | 0.03                           | 3.69            | 96.05                          | 99.77  | 444   | 0.07                           | 4.45            | 95.35                          | 99.87  |
| 445   | 0.03                           | 2.86            | 96.44                          | 99.33  | 446   | 0.21                           | 3.95            | 95.41                          | 99.56  |
| 447   | 0.05                           | 4.57            | 95.49                          | 100.11 | 448   | 0.16                           | 3.93            | 94.92                          | 99.02  |
| 449   | 0.18                           | 3.81            | 95.19                          | 99.18  | 450   | 0.14                           | 4.25            | 95.29                          | 99.68  |
| 451   | 1.93                           | 0.27            | 96.81                          | 99.01  | 452   | 2.00                           | 0.19            | 97.15                          | 99.34  |
| 453   | 1.93                           | 0.50            | 96.89                          | 99.32  | 454   | 1.72                           | 0.59            | 96.98                          | 99.29  |
| 455   | 1.78                           | 0.72            | 96.96                          | 99.46  | 456   | 0.20                           | 1.13            | 97.89                          | 99.22  |
| 457   | 0.29                           | 1.20            | 97.82                          | 99.31  | 458   | 0.51                           | 1.14            | 97.71                          | 99.36  |
| 459   | 0.48                           | 1.03            | 97.69                          | 99.20  | 460   | 0.36                           | 0.74            | 98.27                          | 99.37  |
| 461   | 1.23                           | 0.95            | 97.31                          | 99.48  | 462   | 1.84                           | 0.45            | 97.31                          | 99.60  |
| 463   | 1.53                           | 0.59            | 97.44                          | 99.56  | 464   | 1.73                           | 0.44            | 96.94                          | 99.10  |
| 465   | 1.36                           | 0.69            | 97.24                          | 99.29  | 466   | 2.00                           | 0.42            | 96.39                          | 98.81  |
| 467   | 1.74                           | 0.43            | 96.66                          | 98.83  | 468   | 1.80                           | 0.50            | 96.85                          | 99.15  |
| 469   | 0.95                           | 0.90            | 97.82                          | 99.67  | 470   | 1.32                           | 0.76            | 97.24                          | 99.31  |
| 471   | 1.43                           | 0.82            | 96.78                          | 99.03  | 472   | 1.88                           | 0.40            | 96.69                          | 98.98  |
| 473   | 1.84                           | 0.34            | 97.34                          | 99.52  | 474   | 1.67                           | 0.40            | 97.11                          | 99.17  |
| 475   | 1.83                           | 0.68            | 96.82                          | 99.33  | 476   | 1.66                           | 0.72            | 96.99                          | 99.38  |
| 477   | 1.78                           | 0.64            | 97.21                          | 99.62  | 478   | 1.63                           | 0.61            | 96.98                          | 99.22  |
| 479   | 1.88                           | 0.28            | 96.84                          | 99.00  | 480   | 1.47                           | 0.52            | 96.78                          | 98.77  |
| 481   | 1.93                           | 0.45            | 97.06                          | 99.44  | 482   | 1.91                           | 0.31            | 96.81                          | 99.03  |
| 483   | 1.66                           | 0.73            | 96.65                          | 99.03  | 484   | 1.76                           | 0.66            | 96.72                          | 99.14  |
| 485   | 1.41                           | 0.75            | 96.76                          | 98.92  | 486   | 1.64                           | 0.46            | 97.18                          | 99.28  |
| 487   | 1.59                           | 0.86            | 97.11                          | 99.56  | 488   | 1.39                           | 0.88            | 96.85                          | 99.12  |
| 489   | 1.54                           | 0.67            | 96.69                          | 98.91  | 490   | 0.92                           | 1.24            | 96.64                          | 98.79  |
| 491   | 1.03                           | 1.29            | 97.04                          | 99.35  | 492   | 0.99                           | 1.32            | 97.16                          | 99.48  |
| 493   | 1.08                           | 1.12            | 96.48                          | 98.69  | 494   | 1.04                           | 1.16            | 96.65                          | 98.85  |
| 495   | 1.07                           | 1.23            | 96.41                          | 98.71  | 496   | 1.31                           | 0.98            | 97.19                          | 99.48  |
| 497   | 1.59                           | 0.72            | 96.48                          | 98.79  | 498   | 1.37                           | 0.76            | 97.06                          | 99.20  |
| 499   | 0.82                           | 0.67            | 97.85                          | 99.35  | 500   | 0.89                           | 0.80            | 98.08                          | 99.77  |
| 501   | 0.08                           | 4.29            | 95.15                          | 99.52  | 502   | 0.23                           | 3.99            | 95.23                          | 99.45  |
| 503   | 0.14                           | 4.20            | 94.88                          | 99.22  | 504   | 0.17                           | 4.09            | 95.19                          | 99.45  |
| 505   | 0.10                           | 4.35            | 95.02                          | 99.47  | 506   | 0.08                           | 4.24            | 95.78                          | 100.09 |
| 507   | 0.11                           | 4.25            | 95.23                          | 99.59  | 508   | 0.09                           | 4.28            | 95.19                          | 99.56  |
| 509   | 0.07                           | 3.95            | 95.29                          | 99.31  | 510   | 0.08                           | 3.92            | 95.05                          | 99.05  |
| 511   | 0.12                           | 3.85            | 95.81                          | 99.77  | 512   | 0.11                           | 3.82            | 95.65                          | 99.58  |
| 513   | 0.08                           | 3.88            | 95.93                          | 99.90  | 514   | 0.10                           | 3.81            | 95.65                          | 99.56  |
| 515   | 0.09                           | 3.69            | 95.96                          | 99.75  | 516   | 0.05                           | 3.73            | 95.82                          | 99.61  |
| 517   | 0.07                           | 3.15            | 97.14                          | 100.36 | 518   | 0.04                           | 2.52            | 97.09                          | 99.65  |
| 519   | 0.03                           | 2.66            | 97.44                          | 100.13 | 520   | 0.05                           | 2.18            | 97.61                          | 99.84  |
| 521   | 0.03                           | 3.00            | 96.65                          | 99.68  | 522   | 0.03                           | 2.85            | 97.32                          | 100.20 |
| 523   | 0.15                           | 3.27            | 96.01                          | 99.42  | 524   | 0.09                           | 3.58            | 96.69                          | 100.36 |
| 525   | 0.07                           | 3.51            | 93.88                          | 97.45  | 526   | 0.02                           | 4.00            | 95.55                          | 99.57  |
| 527   | 0.04                           | 3.97            | 95.59                          | 99.60  | 528   | 0.05                           | 3.47            | 96.58                          | 100.10 |

Table S2. continued.

| Point | Al <sub>2</sub> O <sub>3</sub> | WO <sub>3</sub> | Fe <sub>2</sub> O <sub>3</sub> | total  | Point | Al <sub>2</sub> O <sub>3</sub> | WO <sub>3</sub> | Fe <sub>2</sub> O <sub>3</sub> | total  |
|-------|--------------------------------|-----------------|--------------------------------|--------|-------|--------------------------------|-----------------|--------------------------------|--------|
| 529   | 0.05                           | 3.19            | 96.21                          | 99.45  | 530   | 0.32                           | 3.44            | 95.61                          | 99.37  |
| 531   | 0.06                           | 4.77            | 94.98                          | 99.80  | 532   | 0.12                           | 4.54            | 94.95                          | 99.61  |
| 533   | 0.07                           | 3.62            | 96.49                          | 100.19 | 534   | 0.12                           | 4.34            | 95.62                          | 100.07 |
| 535   | 0.11                           | 3.87            | 95.43                          | 99.41  | 536   | 0.18                           | 3.97            | 95.45                          | 99.60  |
| 537   | 0.19                           | 4.17            | 95.26                          | 99.63  | 538   | 0.09                           | 3.32            | 96.12                          | 99.53  |
| 539   | 0.06                           | 3.25            | 96.69                          | 100.01 | 540   | 0.07                           | 3.69            | 96.48                          | 100.24 |
| 541   | 0.17                           | 4.06            | 95.68                          | 99.91  | 542   | 0.06                           | 3.93            | 96.03                          | 100.03 |
| 543   | 0.24                           | 4.21            | 95.02                          | 99.48  | 544   | 0.13                           | 3.71            | 96.42                          | 100.26 |
| 545   | 0.19                           | 4.01            | 96.16                          | 100.36 | 546   | 0.18                           | 4.34            | 95.39                          | 99.91  |
| 547   | 0.09                           | 3.80            | 95.18                          | 99.07  | 548   | 0.03                           | 3.25            | 96.58                          | 99.86  |
| 549   | 0.03                           | 3.00            | 96.75                          | 99.78  | 550   | 0.06                           | 3.61            | 96.19                          | 99.86  |
| 551   | 1.77                           | 0.52            | 97.66                          | 99.96  | 552   | 1.58                           | 0.88            | 97.16                          | 99.62  |
| 553   | 1.72                           | 0.62            | 97.72                          | 100.06 | 554   | 1.61                           | 0.61            | 97.09                          | 99.31  |
| 555   | 1.53                           | 0.72            | 97.62                          | 99.86  | 556   | 1.53                           | 0.83            | 97.45                          | 99.81  |
| 557   | 1.59                           | 0.47            | 97.79                          | 99.85  | 558   | 1.77                           | 0.39            | 97.38                          | 99.54  |
| 559   | 1.80                           | 0.37            | 97.15                          | 99.32  | 560   | 1.98                           | 0.30            | 97.29                          | 99.58  |
| 561   | 1.93                           | 0.35            | 97.58                          | 99.85  | 562   | 2.06                           | 0.17            | 96.92                          | 99.15  |
| 563   | 2.02                           | 0.46            | 97.39                          | 99.87  | 564   | 1.75                           | 0.51            | 97.25                          | 99.51  |
| 565   | 1.46                           | 0.90            | 97.05                          | 99.41  | 566   | 1.70                           | 0.60            | 97.66                          | 99.96  |
| 567   | 1.62                           | 0.68            | 97.21                          | 99.51  | 568   | 1.57                           | 0.57            | 97.65                          | 99.79  |
| 569   | 1.77                           | 0.65            | 96.91                          | 99.33  | 570   | 1.46                           | 0.51            | 97.72                          | 99.69  |
| 571   | 1.58                           | 0.73            | 96.91                          | 99.22  | 572   | 1.28                           | 0.85            | 97.09                          | 99.22  |
| 573   | 1.74                           | 0.70            | 97.35                          | 99.79  | 574   | 2.10                           | 0.26            | 97.31                          | 99.66  |
| 575   | 0.34                           | 0.79            | 99.19                          | 100.33 | 576   | 0.33                           | 0.92            | 99.11                          | 100.36 |
| 577   | 0.24                           | 0.98            | 99.31                          | 100.52 | 578   | 0.17                           | 0.97            | 99.42                          | 100.56 |
| 579   | 0.36                           | 0.79            | 99.01                          | 100.16 | 580   | 0.31                           | 0.98            | 98.99                          | 100.29 |
| 581   | 0.09                           | 1.18            | 98.57                          | 99.84  | 582   | 0.12                           | 0.90            | 98.77                          | 99.78  |
| 583   | 0.15                           | 0.99            | 98.32                          | 99.46  | 584   | 0.11                           | 0.71            | 98.64                          | 99.46  |
| 585   | 1.53                           | 0.66            | 97.52                          | 99.71  | 586   | 1.62                           | 0.58            | 97.45                          | 99.65  |
| 587   | 1.42                           | 0.89            | 97.35                          | 99.66  | 588   | 1.77                           | 0.66            | 97.14                          | 99.57  |
| 589   | 1.70                           | 0.70            | 97.28                          | 99.68  | 590   | 1.06                           | 0.98            | 97.99                          | 100.04 |
| 591   | 1.78                           | 0.61            | 97.55                          | 99.94  | 592   | 1.67                           | 0.55            | 97.51                          | 99.73  |
| 593   | 1.71                           | 0.28            | 97.35                          | 99.34  | 594   | 1.81                           | 0.45            | 97.39                          | 99.65  |
| 595   | 1.88                           | 0.40            | 97.26                          | 99.55  | 596   | 1.68                           | 0.08            | 97.54                          | 99.29  |
| 597   | 1.29                           | 0.27            | 98.05                          | 99.61  | 598   | 1.64                           | 0.63            | 97.68                          | 99.95  |
| 599   | 0.74                           | 0.67            | 98.34                          | 99.75  | 600   | 0.12                           | 0.86            | 98.61                          | 99.59  |
| 601   | 0.05                           | 3.13            | 97.61                          | 100.78 | 602   | 0.08                           | 3.23            | 96.85                          | 100.16 |
| 603   | 0.17                           | 2.88            | 96.24                          | 99.28  | 604   | 0.12                           | 2.94            | 96.54                          | 99.60  |
| 605   | 0.17                           | 2.53            | 97.15                          | 99.86  | 606   | 0.19                           | 2.57            | 97.36                          | 100.12 |
| 607   | 0.17                           | 2.67            | 96.55                          | 99.40  | 608   | 0.18                           | 2.51            | 97.09                          | 99.79  |
| 609   | 0.22                           | 3.25            | 96.31                          | 99.78  | 610   | 0.21                           | 3.13            | 96.16                          | 99.50  |
| 611   | 0.16                           | 2.98            | 96.48                          | 99.61  | 612   | 0.10                           | 3.22            | 96.79                          | 100.10 |
| 613   | 0.02                           | 2.65            | 97.29                          | 99.96  | 614   | 0.12                           | 2.70            | 97.36                          | 100.19 |
| 615   | 0.04                           | 2.66            | 97.55                          | 100.25 | 616   | 0.05                           | 2.47            | 97.54                          | 100.06 |



Table S2. continued.

| Point | Al <sub>2</sub> O <sub>3</sub> | WO <sub>3</sub> | Fe <sub>2</sub> O <sub>3</sub> | total  | Point | Al <sub>2</sub> O <sub>3</sub> | WO <sub>3</sub> | Fe <sub>2</sub> O <sub>3</sub> | total  |
|-------|--------------------------------|-----------------|--------------------------------|--------|-------|--------------------------------|-----------------|--------------------------------|--------|
| 617   | 0.05                           | 3.03            | 97.04                          | 100.12 | 618   | 0.06                           | 2.60            | 97.29                          | 99.95  |
| 619   | 0.02                           | 2.53            | 97.65                          | 100.21 | 620   | 0.15                           | 3.05            | 96.49                          | 99.70  |
| 621   | 0.05                           | 2.76            | 97.19                          | 100.00 | 622   | 0.10                           | 3.00            | 97.15                          | 100.25 |
| 623   | 0.09                           | 2.95            | 96.58                          | 99.62  | 624   | 0.05                           | 2.79            | 97.29                          | 100.13 |
| 625   | 0.25                           | 3.17            | 96.41                          | 99.82  | 626   | 0.03                           | 2.16            | 97.85                          | 100.04 |
| 627   | 0.02                           | 1.80            | 97.91                          | 99.73  | 628   | 0.03                           | 3.01            | 96.92                          | 99.97  |
| 629   | 0.03                           | 2.24            | 97.68                          | 99.95  | 630   | 0.04                           | 1.78            | 97.86                          | 99.68  |
| 631   | 0.12                           | 3.54            | 96.51                          | 100.17 | 632   | 0.08                           | 3.38            | 96.52                          | 99.98  |
| 633   | 0.04                           | 2.23            | 97.92                          | 100.19 | 634   | 0.03                           | 1.46            | 98.75                          | 100.24 |
| 635   | 0.05                           | 1.50            | 98.39                          | 99.94  | 636   | 0.04                           | 3.11            | 97.19                          | 100.35 |
| 637   | 0.06                           | 3.05            | 97.42                          | 100.54 | 638   | 0.12                           | 3.22            | 96.65                          | 99.98  |
| 639   | 0.10                           | 1.13            | 97.97                          | 99.19  | 640   | 0.13                           | 0.79            | 98.71                          | 99.63  |
| 641   | 0.04                           | 2.85            | 97.02                          | 99.91  | 642   | 0.08                           | 2.89            | 96.88                          | 99.85  |
| 643   | 0.03                           | 3.11            | 97.02                          | 100.17 | 644   | 0.03                           | 2.99            | 97.28                          | 100.30 |
| 645   | 0.05                           | 2.82            | 97.34                          | 100.21 | 646   | 0.04                           | 2.23            | 97.72                          | 99.99  |
| 647   | 0.21                           | 3.61            | 95.59                          | 99.41  | 648   | 0.08                           | 4.17            | 95.51                          | 99.76  |
| 649   | 0.10                           | 2.90            | 96.85                          | 99.85  | 650   | 0.04                           | 2.07            | 97.84                          | 99.95  |
| 651   | 1.63                           | 0.33            | 97.14                          | 99.10  | 652   | 1.66                           | 0.33            | 97.45                          | 99.45  |
| 653   | 1.38                           | 0.69            | 97.14                          | 99.21  | 654   | 1.26                           | 0.28            | 97.69                          | 99.24  |
| 655   | 1.52                           | 0.28            | 97.62                          | 99.42  | 656   | 0.31                           | 0.38            | 98.97                          | 99.65  |
| 657   | 0.13                           | 0.33            | 99.24                          | 99.70  | 658   | 0.38                           | 0.54            | 98.58                          | 99.49  |
| 659   | 0.13                           | 0.21            | 99.38                          | 99.72  | 660   | 0.18                           | 0.18            | 98.94                          | 99.30  |
| 661   | 0.30                           | 0.39            | 98.68                          | 99.37  | 662   | 0.30                           | 0.38            | 98.67                          | 99.35  |
| 663   | 0.06                           | 0.53            | 98.95                          | 99.54  | 664   | 0.10                           | 0.35            | 99.01                          | 99.47  |
| 665   | 0.13                           | 0.49            | 99.04                          | 99.67  | 666   | 0.05                           | 0.59            | 99.04                          | 99.68  |
| 667   | 0.08                           | 0.46            | 99.24                          | 99.77  | 668   | 0.78                           | 0.40            | 98.98                          | 100.16 |
| 669   | 0.20                           | 0.29            | 99.22                          | 99.71  | 670   | 0.60                           | 0.43            | 98.72                          | 99.75  |
| 671   | 0.03                           | 0.68            | 98.99                          | 99.71  | 672   | 0.47                           | 0.48            | 98.52                          | 99.47  |
| 673   | 0.29                           | 0.46            | 99.11                          | 99.86  | 674   | 0.19                           | 0.18            | 99.25                          | 99.63  |
| 675   | 0.13                           | 1.07            | 98.75                          | 99.95  | 676   | 0.13                           | 0.95            | 99.08                          | 100.16 |
| 677   | 0.29                           | 0.85            | 98.98                          | 100.12 | 678   | 0.37                           | 1.06            | 98.25                          | 99.68  |
| 679   | 0.26                           | 0.83            | 99.38                          | 100.47 | 680   | 0.08                           | 0.96            | 99.64                          | 100.68 |
| 681   | 0.49                           | 0.73            | 98.72                          | 99.94  | 682   | 0.42                           | 0.81            | 98.79                          | 100.02 |
| 683   | 0.81                           | 0.65            | 99.02                          | 100.48 | 684   | 0.24                           | 0.72            | 99.45                          | 100.42 |
| 685   | 0.13                           | 1.21            | 98.71                          | 100.05 | 686   | 0.05                           | 1.04            | 99.15                          | 100.24 |
| 687   | 1.00                           | 0.49            | 98.54                          | 100.03 | 688   | 0.14                           | 0.49            | 98.78                          | 99.41  |
| 689   | 0.12                           | 0.66            | 98.79                          | 99.58  | 690   | 0.14                           | 0.98            | 98.99                          | 100.11 |
| 691   | 1.09                           | 0.28            | 98.29                          | 99.66  | 692   | 0.40                           | 0.81            | 98.69                          | 99.90  |
| 693   | 0.30                           | 1.03            | 98.71                          | 100.04 | 694   | 0.30                           | 0.96            | 98.95                          | 100.21 |
| 695   | 0.23                           | 0.97            | 98.61                          | 99.81  | 696   | 0.39                           | 0.85            | 98.88                          | 100.11 |
| 697   | 1.18                           | 0.52            | 98.19                          | 99.89  | 698   | 0.36                           | 0.77            | 98.67                          | 99.80  |
| 699   | 0.80                           | 0.70            | 98.68                          | 100.18 | 700   | 0.39                           | 0.92            | 98.97                          | 100.27 |
| 701   | 0.12                           | 4.58            | 95.21                          | 99.90  | 702   | 0.08                           | 3.34            | 96.26                          | 99.68  |
| 703   | 0.08                           | 3.91            | 95.85                          | 99.84  | 704   | 0.04                           | 4.43            | 95.82                          | 100.28 |

Table S2. continued.

| Point | Al <sub>2</sub> O <sub>3</sub> | WO <sub>3</sub> | Fe <sub>2</sub> O <sub>3</sub> | total  | Point | Al <sub>2</sub> O <sub>3</sub> | WO <sub>3</sub> | Fe <sub>2</sub> O <sub>3</sub> | total  |
|-------|--------------------------------|-----------------|--------------------------------|--------|-------|--------------------------------|-----------------|--------------------------------|--------|
| 705   | 0.06                           | 4.25            | 95.55                          | 99.86  | 706   | 0.09                           | 4.40            | 95.23                          | 99.72  |
| 707   | 0.05                           | 4.25            | 95.55                          | 99.84  | 708   | 0.05                           | 3.92            | 96.62                          | 100.59 |
| 709   | 0.04                           | 3.88            | 95.45                          | 99.37  | 710   | 0.08                           | 4.53            | 95.46                          | 100.07 |
| 711   | 0.05                           | 3.97            | 96.32                          | 100.34 | 712   | 0.08                           | 4.36            | 95.65                          | 100.09 |
| 713   | 0.04                           | 3.78            | 96.71                          | 100.53 | 714   | 0.05                           | 3.69            | 96.32                          | 100.07 |
| 715   | 0.05                           | 3.47            | 96.68                          | 100.20 | 716   | 0.05                           | 1.88            | 98.38                          | 100.31 |
| 717   | 0.04                           | 3.77            | 95.93                          | 99.74  | 718   | 0.07                           | 4.44            | 95.93                          | 100.44 |
| 719   | 0.04                           | 2.96            | 97.59                          | 100.60 | 720   | 0.04                           | 3.10            | 97.02                          | 100.17 |
| 721   | 0.06                           | 2.64            | 97.92                          | 100.62 | 722   | 0.02                           | 2.76            | 97.01                          | 99.79  |
| 723   | 0.04                           | 2.64            | 97.36                          | 100.04 | 724   | 0.03                           | 2.60            | 97.54                          | 100.17 |
| 725   | 0.04                           | 3.81            | 96.74                          | 100.59 | 726   | 2.02                           | 0.30            | 97.14                          | 99.46  |
| 727   | 1.73                           | 0.45            | 97.16                          | 99.34  | 728   | 1.88                           | 0.37            | 97.05                          | 99.30  |
| 729   | 1.87                           | 0.49            | 97.34                          | 99.70  | 730   | 1.35                           | 0.87            | 97.61                          | 99.83  |
| 731   | 1.32                           | 0.75            | 96.98                          | 99.04  | 732   | 1.34                           | 0.83            | 97.18                          | 99.35  |
| 733   | 1.65                           | 0.43            | 97.85                          | 99.93  | 734   | 1.68                           | 0.38            | 97.51                          | 99.57  |
| 735   | 0.83                           | 0.57            | 98.01                          | 99.41  | 736   | 1.44                           | 0.69            | 98.02                          | 100.16 |
| 737   | 1.44                           | 0.70            | 97.69                          | 99.83  | 738   | 1.88                           | 0.37            | 97.58                          | 99.83  |
| 739   | 1.77                           | 0.52            | 97.76                          | 100.06 | 740   | 1.93                           | 0.40            | 97.61                          | 99.93  |
| 741   | 1.95                           | 0.42            | 97.35                          | 99.71  | 742   | 1.89                           | 0.39            | 97.44                          | 99.72  |
| 743   | 1.87                           | 0.37            | 97.35                          | 99.59  | 744   | 1.88                           | 0.39            | 97.46                          | 99.74  |
| 745   | 1.98                           | 0.15            | 97.76                          | 99.90  | 746   | 1.82                           | 0.29            | 98.05                          | 100.16 |
| 747   | 1.52                           | 0.86            | 97.71                          | 100.08 | 748   | 1.62                           | 0.53            | 97.92                          | 100.07 |
| 749   | 1.31                           | 0.58            | 98.52                          | 100.41 | 750   | 1.38                           | 0.28            | 98.61                          | 100.27 |
| 751   | 0.05                           | 2.82            | 97.05                          | 99.92  | 752   | 0.01                           | 3.63            | 96.52                          | 100.17 |
| 753   | 0.04                           | 1.70            | 98.24                          | 99.98  | 754   | 0.10                           | 3.25            | 96.45                          | 99.80  |
| 755   | 0.07                           | 1.59            | 97.78                          | 99.44  | 756   | 0.18                           | 3.61            | 96.01                          | 99.79  |
| 757   | 0.03                           | 2.40            | 97.68                          | 100.10 | 758   | 0.11                           | 3.96            | 96.22                          | 100.29 |
| 759   | 0.11                           | 4.22            | 95.49                          | 99.83  | 760   | 0.18                           | 1.43            | 90.16                          | 91.76  |
| 761   | 0.09                           | 3.81            | 95.91                          | 99.80  | 762   | 0.10                           | 3.97            | 95.95                          | 100.02 |
| 763   | 0.06                           | 4.00            | 96.24                          | 100.29 | 764   | 0.09                           | 4.10            | 95.32                          | 99.51  |
| 765   | 0.12                           | 3.72            | 96.14                          | 99.97  | 766   | 0.07                           | 3.99            | 95.82                          | 99.87  |
| 767   | 0.06                           | 3.87            | 96.02                          | 99.95  | 768   | 0.10                           | 3.19            | 96.24                          | 99.53  |
| 769   | 0.13                           | 3.96            | 96.12                          | 100.21 | 770   | 0.12                           | 4.35            | 95.12                          | 99.59  |
| 771   | 0.15                           | 4.19            | 95.31                          | 99.64  | 772   | 0.21                           | 4.22            | 95.28                          | 99.71  |
| 773   | 0.15                           | 3.85            | 95.93                          | 99.93  | 774   | 0.16                           | 3.59            | 95.83                          | 99.59  |
| 775   | 0.25                           | 2.74            | 96.31                          | 99.29  | 776   | 1.65                           | 0.67            | 97.18                          | 99.50  |
| 777   | 1.78                           | 0.52            | 97.04                          | 99.34  | 778   | 2.02                           | 0.35            | 96.98                          | 99.36  |
| 779   | 1.91                           | 0.15            | 97.61                          | 99.66  | 780   | 0.99                           | 0.20            | 98.19                          | 99.39  |
| 781   | 1.82                           | 0.18            | 97.59                          | 99.60  | 782   | 1.71                           | 0.63            | 97.28                          | 99.61  |
| 783   | 1.56                           | 0.69            | 96.96                          | 99.22  | 784   | 1.59                           | 0.67            | 96.98                          | 99.24  |
| 785   | 1.98                           | 0.20            | 97.29                          | 99.48  | 786   | 0.30                           | 0.45            | 94.42                          | 95.17  |
| 787   | 1.04                           | 0.61            | 98.31                          | 99.96  | 788   | 1.67                           | 0.78            | 96.31                          | 98.75  |
| 789   | 1.40                           | 0.84            | 96.99                          | 99.23  | 790   | 1.34                           | 1.10            | 96.98                          | 99.42  |
| 791   | 1.17                           | 1.23            | 96.42                          | 98.82  | 792   | 1.70                           | 0.57            | 96.88                          | 99.15  |

Table S2. continued.

| Point | Al <sub>2</sub> O <sub>3</sub> | WO <sub>3</sub> | Fe <sub>2</sub> O <sub>3</sub> | total  | Point | Al <sub>2</sub> O <sub>3</sub> | WO <sub>3</sub> | Fe <sub>2</sub> O <sub>3</sub> | total  |
|-------|--------------------------------|-----------------|--------------------------------|--------|-------|--------------------------------|-----------------|--------------------------------|--------|
| 793   | 1.85                           | 0.46            | 97.19                          | 99.51  | 794   | 1.36                           | 1.07            | 96.68                          | 99.11  |
| 795   | 1.56                           | 0.78            | 96.98                          | 99.32  | 796   | 1.69                           | 0.50            | 97.94                          | 100.13 |
| 797   | 1.18                           | 0.97            | 97.69                          | 99.85  | 798   | 1.25                           | 0.88            | 96.96                          | 99.10  |
| 799   | 1.59                           | 0.74            | 97.64                          | 99.97  | 800   | 1.40                           | 0.63            | 97.75                          | 99.78  |
| 801   | 0.10                           | 4.10            | 95.89                          | 100.09 | 802   | 0.20                           | 3.28            | 96.75                          | 100.23 |
| 803   | 0.07                           | 3.22            | 96.24                          | 99.52  | 804   | 0.11                           | 3.28            | 97.22                          | 100.61 |
| 805   | 0.06                           | 3.75            | 96.45                          | 100.26 | 806   | 0.10                           | 3.95            | 96.02                          | 100.06 |
| 807   | 0.07                           | 3.58            | 96.41                          | 100.06 | 808   | 0.10                           | 3.59            | 96.49                          | 100.19 |
| 809   | 0.15                           | 3.35            | 96.39                          | 99.90  | 810   | 0.13                           | 3.73            | 96.16                          | 100.02 |
| 811   | 0.20                           | 3.22            | 96.64                          | 100.05 | 812   | 0.06                           | 2.01            | 98.29                          | 100.36 |
| 813   | 0.14                           | 1.54            | 97.48                          | 99.16  | 814   | 0.09                           | 3.10            | 96.41                          | 99.60  |
| 815   | 0.21                           | 2.30            | 97.14                          | 99.64  | 816   | 0.17                           | 3.64            | 96.06                          | 99.87  |
| 817   | 0.16                           | 3.44            | 96.26                          | 99.87  | 818   | 0.14                           | 3.75            | 95.96                          | 99.85  |
| 819   | 0.16                           | 3.23            | 96.39                          | 99.78  | 820   | 0.04                           | 3.37            | 96.88                          | 100.28 |
| 821   | 0.09                           | 4.06            | 96.08                          | 100.23 | 822   | 0.06                           | 3.61            | 96.61                          | 100.28 |
| 823   | 0.08                           | 2.38            | 97.58                          | 100.04 | 824   | 0.18                           | 3.51            | 96.78                          | 100.46 |
| 825   | 0.12                           | 3.32            | 96.88                          | 100.31 | 826   | 0.09                           | 3.33            | 96.98                          | 100.40 |
| 827   | 0.20                           | 3.48            | 96.34                          | 100.01 | 828   | 0.07                           | 2.60            | 97.98                          | 100.65 |
| 829   | 0.06                           | 3.93            | 96.99                          | 100.99 | 830   | 0.09                           | 4.28            | 96.31                          | 100.67 |
| 831   | 0.04                           | 1.75            | 97.94                          | 99.73  | 832   | 0.07                           | 2.93            | 97.64                          | 100.63 |
| 833   | 0.21                           | 2.55            | 95.81                          | 98.57  | 834   | 0.04                           | 2.79            | 97.41                          | 100.24 |
| 835   | 0.24                           | 0.16            | 98.07                          | 98.47  | 836   | 0.11                           | 3.78            | 96.68                          | 100.57 |
| 837   | 0.27                           | 3.29            | 95.91                          | 99.47  | 838   | 0.28                           | 3.37            | 95.92                          | 99.56  |
| 839   | 0.22                           | 3.61            | 95.75                          | 99.57  | 840   | 1.37                           | 0.85            | 97.12                          | 99.34  |
| 841   | 0.28                           | 1.95            | 98.18                          | 100.42 | 842   | 0.25                           | 2.47            | 96.94                          | 99.66  |
| 843   | 0.23                           | 3.10            | 96.42                          | 99.75  | 844   | 0.24                           | 2.88            | 97.01                          | 100.12 |
| 845   | 0.22                           | 1.92            | 97.55                          | 99.68  | 846   | 0.07                           | 2.53            | 97.15                          | 99.76  |
| 847   | 0.14                           | 2.67            | 96.86                          | 99.68  | 848   | 0.18                           | 3.14            | 97.05                          | 100.37 |
| 849   | 0.21                           | 2.94            | 97.19                          | 100.34 | 850   | 0.05                           | 1.74            | 98.11                          | 99.89  |
| 851   | 0.07                           | 1.89            | 98.18                          | 100.14 | 852   | 0.23                           | 2.17            | 96.96                          | 99.37  |
| 853   | 0.29                           | 3.40            | 95.73                          | 99.43  | 854   | 0.22                           | 3.39            | 95.93                          | 99.55  |
| 855   | 1.55                           | 0.15            | 95.62                          | 97.32  | 856   | 0.69                           | 1.97            | 96.79                          | 99.45  |
| 857   | 0.04                           | 3.44            | 97.12                          | 100.61 | 858   | 0.05                           | 1.21            | 98.84                          | 100.10 |
| 859   | 0.19                           | 0.35            | 86.91                          | 87.46  | 860   | 0.07                           | 4.33            | 96.02                          | 100.42 |
| 861   | 0.11                           | 4.12            | 96.36                          | 100.60 | 862   | 0.10                           | 3.44            | 96.72                          | 100.26 |
| 863   | 0.04                           | 1.65            | 98.22                          | 99.91  | 864   | 0.07                           | 3.86            | 96.35                          | 100.28 |
| 865   | 0.15                           | 3.68            | 96.31                          | 100.14 | 866   | 1.16                           | 0.65            | 97.48                          | 99.29  |
| 867   | 0.41                           | 2.41            | 97.15                          | 99.97  | 868   | 0.08                           | 3.35            | 96.14                          | 99.57  |
| 869   | 0.10                           | 1.46            | 98.29                          | 99.86  | 870   | 0.21                           | 3.66            | 90.54                          | 94.41  |
| 871   | 0.19                           | 2.28            | 97.81                          | 100.28 | 872   | 0.70                           | 2.89            | 93.48                          | 97.07  |
| 873   | 0.09                           | 4.01            | 96.08                          | 100.18 | 874   | 0.10                           | 3.49            | 96.95                          | 100.54 |
| 875   | 0.17                           | 1.64            | 55.96                          | 57.77  | 876   | 0.12                           | 2.94            | 97.49                          | 100.55 |
| 877   | 0.14                           | 1.89            | 98.44                          | 100.47 | 878   | 0.08                           | 3.75            | 96.58                          | 100.40 |
| 879   | 0.06                           | 3.57            | 97.21                          | 100.83 | 880   | 0.19                           | 4.25            | 95.18                          | 99.62  |

Table S2. continued.

| Point | Al <sub>2</sub> O <sub>3</sub> | WO <sub>3</sub> | Fe <sub>2</sub> O <sub>3</sub> | total  | Point | Al <sub>2</sub> O <sub>3</sub> | WO <sub>3</sub> | Fe <sub>2</sub> O <sub>3</sub> | total  |
|-------|--------------------------------|-----------------|--------------------------------|--------|-------|--------------------------------|-----------------|--------------------------------|--------|
| 881   | 0.15                           | 4.22            | 95.58                          | 99.95  | 882   | 0.14                           | 4.30            | 95.52                          | 99.96  |
| 883   | 0.17                           | 4.30            | 95.33                          | 99.81  | 884   | 0.14                           | 4.04            | 95.46                          | 99.63  |
| 885   | 0.17                           | 3.97            | 95.32                          | 99.46  | 886   | 0.15                           | 4.36            | 94.93                          | 99.45  |
| 887   | 0.14                           | 4.34            | 95.71                          | 100.18 | 888   | 0.12                           | 4.31            | 95.28                          | 99.71  |
| 889   | 0.11                           | 4.21            | 95.28                          | 99.60  | 890   | 0.10                           | 0.99            | 98.01                          | 99.09  |
| 891   | 0.17                           | 4.15            | 95.33                          | 99.65  | 892   | 0.13                           | 3.57            | 95.85                          | 99.55  |
| 893   | 0.13                           | 4.10            | 95.53                          | 99.76  | 894   | 0.08                           | 4.40            | 95.69                          | 100.17 |
| 895   | 0.16                           | 3.88            | 95.22                          | 99.26  | 896   | 0.14                           | 3.63            | 95.98                          | 99.75  |
| 897   | 0.16                           | 4.35            | 95.09                          | 99.60  | 898   | 0.22                           | 4.45            | 94.85                          | 99.52  |
| 899   | 0.21                           | 4.45            | 95.11                          | 99.77  | 900   | 0.14                           | 5.03            | 95.06                          | 100.23 |
| 901   | 0.13                           | 4.43            | 94.88                          | 99.44  | 902   | 0.19                           | 3.87            | 95.03                          | 99.10  |
| 903   | 0.12                           | 4.69            | 94.99                          | 99.80  | 904   | 0.14                           | 4.60            | 94.71                          | 99.45  |
| 905   | 0.05                           | 4.15            | 94.76                          | 98.96  | 906   | 0.12                           | 4.44            | 94.91                          | 99.47  |
| 907   | 0.09                           | 4.43            | 95.29                          | 99.81  | 908   | 0.12                           | 3.90            | 95.43                          | 99.45  |
| 909   | 0.09                           | 3.39            | 95.61                          | 99.09  | 910   | 0.14                           | 3.93            | 95.41                          | 99.48  |
| 911   | 0.22                           | 4.02            | 95.48                          | 99.72  | 912   | 0.16                           | 4.28            | 94.89                          | 99.32  |
| 913   | 0.10                           | 4.65            | 94.23                          | 98.99  | 914   | 0.12                           | 4.70            | 93.96                          | 98.79  |
| 915   | 0.23                           | 4.04            | 95.19                          | 99.46  | 916   | 0.19                           | 4.01            | 95.19                          | 99.39  |
| 917   | 0.18                           | 3.97            | 95.09                          | 99.25  | 918   | 0.14                           | 4.07            | 95.33                          | 99.55  |
| 919   | 0.13                           | 3.85            | 95.83                          | 99.81  | 920   | 0.13                           | 3.62            | 95.68                          | 99.43  |
| 921   | 0.10                           | 3.58            | 95.93                          | 99.62  | 922   | 0.15                           | 3.96            | 95.39                          | 99.50  |
| 923   | 0.11                           | 3.90            | 95.75                          | 99.75  | 924   | 0.16                           | 4.05            | 95.16                          | 99.37  |
| 925   | 0.16                           | 4.06            | 95.35                          | 99.57  | 926   | 0.14                           | 4.16            | 95.18                          | 99.47  |
| 927   | 0.14                           | 3.87            | 95.88                          | 99.89  | 928   | 0.16                           | 4.10            | 95.68                          | 99.94  |
| 929   | 0.10                           | 3.27            | 95.65                          | 99.02  | 930   | 0.16                           | 3.82            | 95.69                          | 99.68  |
| 931   | 0.15                           | 3.95            | 95.31                          | 99.40  | 932   | 0.14                           | 4.06            | 95.09                          | 99.29  |
| 933   | 0.14                           | 4.11            | 95.39                          | 99.64  | 934   | 0.15                           | 4.20            | 95.48                          | 99.83  |
| 935   | 0.12                           | 3.81            | 95.51                          | 99.43  | 936   | 0.10                           | 3.62            | 95.86                          | 99.59  |
| 937   | 0.10                           | 3.37            | 95.85                          | 99.31  | 938   | 0.12                           | 3.85            | 95.65                          | 99.62  |
| 939   | 0.07                           | 3.18            | 96.15                          | 99.40  | 940   | 0.15                           | 3.92            | 95.28                          | 99.35  |
| 941   | 0.14                           | 4.01            | 95.66                          | 99.81  | 942   | 0.11                           | 4.29            | 95.06                          | 99.46  |
| 943   | 0.22                           | 3.87            | 95.18                          | 99.27  | 944   | 0.18                           | 3.91            | 95.12                          | 99.21  |
| 945   | 0.16                           | 4.15            | 95.18                          | 99.48  | 946   | 0.15                           | 4.39            | 94.89                          | 99.43  |
| 947   | 0.15                           | 4.57            | 94.79                          | 99.50  | 948   | 0.17                           | 4.64            | 94.16                          | 98.97  |
| 949   | 0.18                           | 4.53            | 93.80                          | 98.52  | 950   | 0.20                           | 4.26            | 93.48                          | 97.94  |
| 951   | 0.15                           | 4.29            | 92.59                          | 97.02  | 952   | 0.12                           | 4.35            | 92.70                          | 97.18  |
| 953   | 0.18                           | 4.12            | 94.23                          | 98.53  | 954   | 0.11                           | 4.41            | 94.51                          | 99.03  |
| 955   | 0.10                           | 4.44            | 94.71                          | 99.25  | 956   | 0.14                           | 4.35            | 95.06                          | 99.55  |
| 957   | 0.20                           | 4.34            | 95.13                          | 99.67  | 958   | 0.18                           | 4.33            | 94.72                          | 99.22  |
| 959   | 0.16                           | 4.50            | 94.66                          | 99.33  | 960   | 0.19                           | 4.29            | 94.88                          | 99.35  |
| 961   | 0.19                           | 4.14            | 95.33                          | 99.66  | 962   | 0.14                           | 4.02            | 94.46                          | 98.62  |
| 963   | 0.18                           | 4.12            | 95.41                          | 99.71  | 964   | 0.25                           | 2.79            | 76.38                          | 79.41  |
| 965   | 0.68                           | 0.04            | 25.85                          | 26.57  | 966   | 0.08                           | 3.37            | 96.19                          | 99.64  |
| 967   | 0.16                           | 4.12            | 94.55                          | 98.83  | 968   | 0.14                           | 4.11            | 95.38                          | 99.63  |

Table S2. continued.

| Point | Al <sub>2</sub> O <sub>3</sub> | WO <sub>3</sub> | Fe <sub>2</sub> O <sub>3</sub> | total  | Point | Al <sub>2</sub> O <sub>3</sub> | WO <sub>3</sub> | Fe <sub>2</sub> O <sub>3</sub> | total  |
|-------|--------------------------------|-----------------|--------------------------------|--------|-------|--------------------------------|-----------------|--------------------------------|--------|
| 969   | 0.15                           | 3.75            | 95.89                          | 99.78  | 970   | 0.09                           | 3.38            | 95.86                          | 99.34  |
| 971   | 0.13                           | 3.22            | 95.93                          | 99.28  | 972   | 0.21                           | 3.33            | 95.71                          | 99.24  |
| 973   | 0.16                           | 3.69            | 95.71                          | 99.56  | 974   | 0.17                           | 4.09            | 95.19                          | 99.45  |
| 975   | 0.12                           | 3.81            | 95.32                          | 99.24  | 976   | 0.21                           | 4.12            | 95.52                          | 99.85  |
| 977   | 0.18                           | 4.43            | 95.03                          | 99.64  | 978   | 0.23                           | 4.31            | 95.35                          | 99.89  |
| 979   | 0.21                           | 4.10            | 95.13                          | 99.44  | 980   | 0.19                           | 4.02            | 95.41                          | 99.62  |
| 981   | 0.20                           | 4.10            | 95.58                          | 99.88  | 982   | 0.22                           | 4.24            | 95.56                          | 100.02 |
| 983   | 0.20                           | 4.34            | 95.38                          | 99.92  | 984   | 0.22                           | 4.28            | 95.38                          | 99.87  |
| 985   | 0.12                           | 1.87            | 96.92                          | 98.91  | 986   | 0.19                           | 3.73            | 95.82                          | 99.74  |
| 987   | 0.19                           | 3.62            | 96.31                          | 100.11 | 988   | 0.16                           | 3.43            | 96.15                          | 99.74  |
| 989   | 0.15                           | 3.03            | 97.19                          | 100.37 | 990   | 0.21                           | 3.17            | 96.12                          | 99.49  |
| 991   | 0.19                           | 3.61            | 95.55                          | 99.35  | 992   | 0.17                           | 3.86            | 95.22                          | 99.25  |
| 993   | 0.18                           | 3.73            | 95.29                          | 99.20  | 994   | 0.18                           | 4.15            | 95.75                          | 100.08 |
| 995   | 0.22                           | 3.78            | 95.83                          | 99.84  | 996   | 0.21                           | 3.90            | 95.52                          | 99.62  |
| 997   | 0.27                           | 3.87            | 95.42                          | 99.56  | 998   | 0.19                           | 3.95            | 95.76                          | 99.90  |
| 999   | 0.20                           | 3.69            | 95.59                          | 99.49  | 1000  | 0.24                           | 3.80            | 95.68                          | 99.71  |
| 1001  | 1.52                           | 0.90            | 96.98                          | 99.40  | 1002  | 1.66                           | 0.60            | 97.34                          | 99.59  |
| 1003  | 1.34                           | 0.63            | 97.79                          | 99.76  | 1004  | 1.31                           | 0.95            | 97.35                          | 99.61  |
| 1005  | 0.13                           | 0.11            | 99.55                          | 99.79  | 1006  | 1.48                           | 0.60            | 97.74                          | 99.82  |
| 1007  | 1.38                           | 0.77            | 96.91                          | 99.06  | 1008  | 1.47                           | 0.66            | 97.38                          | 99.51  |
| 1009  | 1.93                           | 0.53            | 97.15                          | 99.61  | 1010  | 1.07                           | 1.08            | 95.49                          | 97.65  |
| 1011  | 1.20                           | 0.79            | 96.91                          | 98.90  | 1012  | 1.64                           | 0.75            | 97.11                          | 99.49  |
| 1013  | 1.41                           | 0.73            | 97.05                          | 99.20  | 1014  | 0.74                           | 0.85            | 87.17                          | 88.76  |
| 1015  | 1.13                           | 0.87            | 97.66                          | 99.66  | 1016  | 1.41                           | 0.41            | 96.99                          | 98.81  |
| 1017  | 0.04                           | 0.53            | 98.64                          | 99.21  | 1018  | 0.01                           | 0.29            | 99.19                          | 99.49  |
| 1019  | 1.91                           | 0.28            | 97.99                          | 100.18 | 1020  | 1.75                           | 0.27            | 97.84                          | 99.86  |
| 1021  | 1.59                           | 0.30            | 98.05                          | 99.93  | 1022  | 1.78                           | 0.28            | 97.69                          | 99.76  |
| 1023  | 1.74                           | 0.25            | 97.62                          | 99.62  | 1024  | 1.30                           | 0.18            | 98.04                          | 99.52  |
| 1025  | 1.12                           | 0.35            | 98.27                          | 99.74  | 1026  | 1.09                           | 0.27            | 98.87                          | 100.23 |
| 1027  | 1.53                           | 0.35            | 97.99                          | 99.87  | 1028  | 0.86                           | 0.43            | 98.64                          | 99.92  |
| 1029  | 1.40                           | 0.25            | 97.88                          | 99.53  | 1030  | 0.58                           | 0.47            | 98.57                          | 99.61  |
| 1031  | 0.61                           | 0.51            | 98.37                          | 99.48  | 1032  | 0.49                           | 0.55            | 98.74                          | 99.78  |
| 1033  | 0.26                           | 0.38            | 99.61                          | 100.25 | 1034  | 0.49                           | 0.42            | 98.97                          | 99.87  |
| 1035  | 0.55                           | 0.46            | 99.02                          | 100.02 | 1036  | 0.90                           | 0.25            | 98.35                          | 99.50  |
| 1037  | 0.66                           | 0.30            | 98.39                          | 99.35  | 1038  | 0.83                           | 0.36            | 98.31                          | 99.50  |
| 1039  | 0.74                           | 0.48            | 98.92                          | 100.14 | 1040  | 0.89                           | 0.35            | 98.85                          | 100.09 |
| 1041  | 0.09                           | 0.96            | 98.75                          | 99.80  | 1042  | 0.56                           | 0.68            | 98.69                          | 99.94  |
| 1043  | 0.70                           | 0.57            | 98.75                          | 100.02 | 1044  | 0.71                           | 0.44            | 98.89                          | 100.04 |
| 1045  | 1.22                           | 0.07            | 98.31                          | 99.60  | 1046  | 1.34                           | 0.29            | 98.72                          | 100.35 |
| 1047  | 0.43                           | 0.72            | 98.58                          | 99.73  | 1048  | 0.25                           | 0.76            | 99.21                          | 100.22 |
| 1049  | 1.21                           | 0.30            | 98.29                          | 99.80  | 1050  | 1.31                           | 0.21            | 97.98                          | 99.50  |
| 1051  | 0.06                           | 0.46            | 99.71                          | 100.23 | 1052  | 0.04                           | 0.59            | 99.64                          | 100.27 |
| 1053  | 0.17                           | 0.44            | 99.07                          | 99.68  | 1054  | 0.04                           | 0.65            | 99.14                          | 99.83  |
| 1055  | 0.06                           | 0.32            | 99.37                          | 99.74  | 1056  | 0.63                           | 0.46            | 98.91                          | 100.00 |

Table S2. continued.

| Point | Al <sub>2</sub> O <sub>3</sub> | WO <sub>3</sub> | Fe <sub>2</sub> O <sub>3</sub> | total  | Point | Al <sub>2</sub> O <sub>3</sub> | WO <sub>3</sub> | Fe <sub>2</sub> O <sub>3</sub> | total  |
|-------|--------------------------------|-----------------|--------------------------------|--------|-------|--------------------------------|-----------------|--------------------------------|--------|
| 1057  | 0.45                           | 0.50            | 98.78                          | 99.72  | 1058  | 0.28                           | 0.59            | 99.72                          | 100.60 |
| 1059  | 0.31                           | 0.58            | 98.91                          | 99.80  | 1060  | 0.54                           | 0.47            | 98.58                          | 99.59  |
| 1061  | 0.17                           | 0.76            | 99.22                          | 100.14 | 1062  | 0.14                           | 0.83            | 98.92                          | 99.90  |
| 1063  | 0.22                           | 0.48            | 99.04                          | 99.74  | 1064  | 0.51                           | 0.63            | 98.92                          | 100.06 |
| 1065  | 0.54                           | 0.46            | 98.59                          | 99.59  | 1066  | 1.03                           | 0.48            | 98.17                          | 99.68  |
| 1067  | 0.63                           | 0.47            | 98.91                          | 100.01 | 1068  | 0.52                           | 0.66            | 98.48                          | 99.66  |
| 1069  | 0.40                           | 0.55            | 99.17                          | 100.12 | 1070  | 0.55                           | 0.28            | 98.87                          | 99.70  |
| 1071  | 0.25                           | 0.74            | 98.92                          | 99.91  | 1072  | 0.23                           | 0.87            | 98.85                          | 99.95  |
| 1073  | 0.42                           | 0.60            | 98.85                          | 99.87  | 1074  | 0.44                           | 0.59            | 99.01                          | 100.03 |
| 1075  | 0.40                           | 0.45            | 98.79                          | 99.64  | 1076  | 0.38                           | 0.46            | 99.12                          | 99.96  |
| 1077  | 0.34                           | 0.48            | 99.34                          | 100.16 | 1078  | 0.78                           | 0.31            | 99.01                          | 100.09 |
| 1079  | 0.17                           | 0.60            | 98.89                          | 99.66  | 1080  | 0.65                           | 0.35            | 99.27                          | 100.27 |
| 1081  | 0.30                           | 0.74            | 98.82                          | 99.86  | 1082  | 0.94                           | 0.19            | 98.64                          | 99.77  |
| 1083  | 0.38                           | 0.40            | 99.17                          | 99.94  | 1084  | 0.41                           | 0.41            | 99.38                          | 100.20 |
| 1085  | 0.12                           | 0.40            | 99.35                          | 99.86  | 1086  | 0.41                           | 0.46            | 99.32                          | 100.19 |
| 1087  | 0.23                           | 0.86            | 99.02                          | 100.11 | 1088  | 0.12                           | 0.90            | 99.22                          | 100.24 |
| 1089  | 0.20                           | 0.71            | 99.05                          | 99.96  | 1090  | 0.12                           | 0.68            | 98.92                          | 99.72  |
| 1091  | 1.79                           | 0.41            | 97.68                          | 99.88  | 1092  | 2.04                           | 0.21            | 97.65                          | 99.90  |
| 1093  | 0.37                           | 0.46            | 99.14                          | 99.97  | 1094  | 0.38                           | 0.41            | 98.69                          | 99.48  |
| 1095  | 1.53                           | 0.31            | 98.34                          | 100.17 | 1096  | 1.53                           | 0.27            | 98.19                          | 100.00 |
| 1097  | 0.89                           | 0.18            | 96.72                          | 97.79  | 1098  | 0.04                           | 2.91            | 96.59                          | 99.55  |
| 1099  | 0.40                           | 0.49            | 98.15                          | 99.05  | 1100  | 1.34                           | 0.24            | 98.72                          | 100.30 |
| 1101  | 1.85                           | 0.37            | 97.86                          | 100.09 | 1102  | 1.89                           | 0.40            | 97.92                          | 100.21 |
| 1103  | 1.93                           | 0.41            | 97.88                          | 100.22 | 1104  | 1.84                           | 0.38            | 97.84                          | 100.05 |
| 1105  | 0.40                           | 2.90            | 96.95                          | 100.25 | 1106  | 1.87                           | 0.44            | 97.71                          | 100.02 |
| 1107  | 1.46                           | 0.69            | 97.72                          | 99.88  | 1108  | 1.44                           | 0.58            | 97.48                          | 99.50  |
| 1109  | 1.74                           | 0.46            | 97.97                          | 100.16 | 1110  | 1.67                           | 0.46            | 98.05                          | 100.18 |
| 1111  | 1.79                           | 0.39            | 98.55                          | 100.73 | 1112  | 1.62                           | 0.39            | 98.28                          | 100.29 |
| 1113  | 1.60                           | 0.32            | 97.94                          | 99.86  | 1114  | 1.58                           | 0.43            | 97.95                          | 99.97  |
| 1115  | 1.84                           | 0.31            | 97.94                          | 100.08 | 1116  | 1.74                           | 0.34            | 98.25                          | 100.33 |
| 1117  | 1.83                           | 0.13            | 96.56                          | 98.52  | 1118  | 1.57                           | 0.29            | 97.91                          | 99.76  |
| 1119  | 1.98                           | 0.21            | 98.11                          | 100.31 | 1120  | 1.87                           | 0.26            | 97.72                          | 99.85  |
| 1121  | 1.79                           | 0.35            | 98.17                          | 100.31 | 1122  | 1.89                           | 0.23            | 97.41                          | 99.52  |
| 1123  | 1.89                           | 0.28            | 98.02                          | 100.19 | 1124  | 2.02                           | 0.00            | 98.07                          | 100.09 |
| 1125  | 1.93                           | 0.09            | 97.75                          | 99.77  | 1126  | 1.91                           | 0.15            | 97.75                          | 99.81  |
| 1127  | 1.71                           | 0.33            | 98.22                          | 100.26 | 1128  | 1.98                           | 0.26            | 97.72                          | 99.96  |
| 1129  | 2.02                           | 0.20            | 97.71                          | 99.93  | 1130  | 1.63                           | 0.26            | 98.47                          | 100.35 |
| 1131  | 1.83                           | 0.15            | 97.97                          | 99.95  | 1132  | 1.81                           | 0.33            | 98.07                          | 100.21 |
| 1133  | 1.03                           | 0.48            | 98.55                          | 100.06 | 1134  | 0.98                           | 0.49            | 99.08                          | 100.56 |
| 1135  | 0.84                           | 0.50            | 99.02                          | 100.36 | 1136  | 2.00                           | 0.16            | 97.91                          | 100.07 |
| 1137  | 1.29                           | 0.35            | 98.37                          | 100.00 | 1138  | 1.35                           | 0.28            | 97.78                          | 99.41  |
| 1139  | 1.18                           | 0.21            | 98.58                          | 99.97  | 1140  | 0.61                           | 0.32            | 99.37                          | 100.29 |
| 1141  | 0.46                           | 0.58            | 98.89                          | 99.93  | 1142  | 0.79                           | 0.75            | 98.77                          | 100.31 |
| 1143  | 1.59                           | 0.04            | 98.47                          | 100.09 | 1144  | 0.65                           | 0.38            | 99.65                          | 100.68 |

Table S2. continued.

| Point | Al <sub>2</sub> O <sub>3</sub> | WO <sub>3</sub> | Fe <sub>2</sub> O <sub>3</sub> | total  | Point | Al <sub>2</sub> O <sub>3</sub> | WO <sub>3</sub> | Fe <sub>2</sub> O <sub>3</sub> | total  |
|-------|--------------------------------|-----------------|--------------------------------|--------|-------|--------------------------------|-----------------|--------------------------------|--------|
| 1145  | 1.11                           | 0.23            | 98.99                          | 100.34 | 1146  | 1.45                           | 0.32            | 98.42                          | 100.20 |
| 1147  | 1.24                           | 0.25            | 98.85                          | 100.34 | 1148  | 0.53                           | 0.26            | 99.59                          | 100.39 |
| 1149  | 0.07                           | 0.22            | 100.07                         | 100.36 | 1150  | 0.24                           | 0.49            | 99.84                          | 100.57 |
| 1151  | 0.17                           | 0.45            | 99.71                          | 100.32 | 1152  | 0.11                           | 0.54            | 99.78                          | 100.43 |
| 1153  | 0.09                           | 0.58            | 99.65                          | 100.32 | 1154  | 0.13                           | 0.96            | 99.28                          | 100.37 |
| 1155  | 0.05                           | 1.27            | 99.19                          | 100.51 | 1156  | 0.08                           | 0.99            | 99.64                          | 100.70 |
| 1157  | 0.11                           | 0.95            | 99.59                          | 100.65 | 1158  | 0.13                           | 0.96            | 99.55                          | 100.64 |
| 1159  | 0.12                           | 0.70            | 99.61                          | 100.43 | 1160  | 0.11                           | 0.76            | 99.27                          | 100.13 |
| 1161  | 0.12                           | 0.66            | 99.80                          | 100.58 | 1162  | 0.14                           | 0.83            | 99.62                          | 100.60 |
| 1163  | 0.35                           | 0.64            | 99.47                          | 100.46 | 1164  | 0.65                           | 0.68            | 99.32                          | 100.65 |
| 1165  | 0.20                           | 0.69            | 99.32                          | 100.21 | 1166  | 0.16                           | 0.67            | 100.01                         | 100.84 |
| 1167  | 0.14                           | 0.77            | 99.58                          | 100.49 | 1168  | 0.14                           | 0.67            | 99.49                          | 100.31 |
| 1169  | 0.40                           | 0.72            | 99.70                          | 100.81 | 1170  | 0.58                           | 0.74            | 99.21                          | 100.53 |
| 1171  | 0.62                           | 0.85            | 98.71                          | 100.17 | 1172  | 0.98                           | 0.27            | 98.88                          | 100.13 |
| 1173  | 1.34                           | 0.39            | 98.69                          | 100.41 | 1174  | 0.72                           | 0.48            | 98.89                          | 100.09 |
| 1175  | 1.21                           | 0.18            | 99.21                          | 100.60 | 1176  | 0.33                           | 0.52            | 99.81                          | 100.66 |
| 1177  | 0.08                           | 0.33            | 99.92                          | 100.34 | 1178  | 0.09                           | 0.84            | 99.87                          | 100.79 |
| 1179  | 1.27                           | 0.23            | 98.62                          | 100.13 | 1180  | 0.96                           | 0.43            | 99.01                          | 100.40 |
| 1181  | 1.10                           | 0.37            | 99.05                          | 100.52 | 1182  | 1.46                           | 0.20            | 98.27                          | 99.93  |
| 1183  | 0.88                           | 0.39            | 99.19                          | 100.46 | 1184  | 0.20                           | 0.81            | 99.48                          | 100.49 |
| 1185  | 0.18                           | 0.72            | 99.85                          | 100.76 | 1186  | 0.12                           | 0.64            | 99.21                          | 99.97  |
| 1187  | 0.11                           | 0.49            | 100.05                         | 100.65 | 1188  | 0.12                           | 0.71            | 99.49                          | 100.32 |
| 1189  | 0.18                           | 0.63            | 99.78                          | 100.58 | 1190  | 0.12                           | 0.60            | 99.55                          | 100.27 |
| 1191  | 0.17                           | 0.87            | 99.27                          | 100.31 | 1192  | 0.48                           | 0.97            | 98.94                          | 100.39 |
| 1193  | 0.15                           | 0.71            | 99.78                          | 100.64 | 1194  | 0.09                           | 0.61            | 99.51                          | 100.21 |
| 1195  | 0.19                           | 0.90            | 99.41                          | 100.50 | 1196  | 0.28                           | 0.95            | 99.19                          | 100.42 |
| 1197  | 0.34                           | 1.11            | 99.35                          | 100.80 | 1198  | 0.04                           | 0.77            | 99.38                          | 100.19 |
| 1199  | 0.05                           | 0.85            | 99.07                          | 99.96  | 1200  | 0.80                           | 0.36            | 99.02                          | 100.18 |

**Table S2.** Paths, coordination number (n), interatomic distance (d) and  $\sigma^2$  of the model of ferberite (Escobar et al. 1971) fit to the respective spectra of hematite A, B and C, compared to the corresponding literature values for ferberite.

|         |   | hematite A  |            | hematite B  |            | hematite C  |            | ferberite |   |       |
|---------|---|-------------|------------|-------------|------------|-------------|------------|-----------|---|-------|
| paths   | n | d (Å)       | $\sigma^2$ | d (Å)       | $\sigma^2$ | d (Å)       | $\sigma^2$ | paths     | n | d (Å) |
| W–O     | 1 | 1.732±0.010 | 0.004      | 1.747±0.011 | 0.004      | 1.740±0.011 | 0.004      | W–O       | 2 | 1.883 |
|         | 3 | 1.857±0.004 | 0.004      | 1.848±0.004 | 0.004      | 1.850±0.004 | 0.004      |           | 2 | 1.991 |
|         | 2 | 1.975±0.004 | 0.004      | 1.966±0.004 | 0.004      | 1.968±0.004 | 0.004      |           | 2 | 2.109 |
| W–W     | 2 | 3.110±0.014 | 0.003      | 3.095±0.015 | 0.003      | 3.109±0.015 | 0.002      | W–W       | 2 | 3.233 |
|         | 2 | 4.548±0.010 | 0.003      | 4.534±0.010 | 0.003      | 4.548±0.010 | 0.002      |           | 2 | 4.417 |
|         | 2 | 4.667±0.008 | 0.003      | 4.662±0.012 | 0.003      | 4.688±0.008 | 0.002      |           | 2 | 4.750 |
|         | 2 | 5.101±0.010 | 0.003      | 5.087±0.010 | 0.003      | 5.101±0.010 | 0.002      |           | 2 | 4.970 |
|         | 2 | 5.669±0.008 | 0.003      | 5.664±0.012 | 0.003      | 5.699±0.008 | 0.002      |           | 2 | 5.720 |
|         | 2 | 5.851±0.010 | 0.003      | 5.837±0.010 | 0.003      | 5.851±0.010 | 0.002      |           | 2 | 5.740 |
|         | 2 | 5.871±0.010 | 0.003      | 5.857±0.010 | 0.003      | 5.871±0.010 | 0.002      |           | 2 | 5.752 |
| W–Fe    | 2 | 3.407±0.004 | 0.003      | 3.402±0.005 | 0.003      | 3.426±0.004 | 0.002      | W–Fe      | 2 | 3.525 |
|         | 2 | 3.416±0.004 | 0.003      | 3.412±0.005 | 0.003      | 3.436±0.004 | 0.002      |           | 2 | 3.535 |
|         | 2 | 3.584±0.014 | 0.003      | 3.570±0.015 | 0.003      | 3.584±0.015 | 0.002      |           | 2 | 3.707 |
|         | 2 | 3.645±0.008 | 0.003      | 3.640±0.012 | 0.003      | 3.666±0.008 | 0.002      |           | 2 | 3.728 |
|         | 2 | 6.126±0.010 | 0.003      | 6.112±0.010 | 0.003      | 6.126±0.010 | 0.002      |           | 2 | 5.995 |
|         | 2 | 6.132±0.010 | 0.003      | 6.118±0.010 | 0.003      | 6.132±0.010 | 0.002      |           | 2 | 6.000 |
| W–O–O–W | 4 | 3.033       | -          | 3.031       | -          | 3.029       | -          | W–O–O–W   | 4 | 3.312 |
|         | 2 | 3.080       | -          | 3.079       | -          | 3.076       | -          |           | 2 | 3.360 |
|         | 4 | 3.109       | -          | 3.108       | -          | 3.105       | -          |           | 4 | 3.389 |
|         | 4 | 3.121       | -          | 3.119       | -          | 3.116       | -          |           | 4 | 3.400 |
|         | 4 | 3.128       | -          | 3.126       | -          | 3.124       | -          |           | 4 | 3.407 |
|         | 4 | 3.155       | -          | 3.154       | -          | 3.151       | -          |           | 4 | 3.435 |
|         | 2 | 3.657       | -          | 3.656       | -          | 3.653       | -          |           | 2 | 3.936 |
|         | 4 | 3.695       | -          | 3.693       | -          | 3.691       | -          |           | 4 | 3.974 |
|         | 4 | 3.698       | -          | 3.697       | -          | 3.944       | -          |           | 4 | 3.978 |

  

|                                                                                                        |                                                                                                         |                                                                                                         |
|--------------------------------------------------------------------------------------------------------|---------------------------------------------------------------------------------------------------------|---------------------------------------------------------------------------------------------------------|
| $\Delta E_0=2.31$ , $N_{var}=10$ ,<br>$N_{ind}=20.4$ , $R=0.019$ ,<br>k-range=3.0-9.5, R-<br>range=1-6 | $\Delta E_0=1.48$ , $N_{var}=10$ ,<br>$N_{ind}=20.4$ , $R=0.020$ , k-<br>range=3.0-9.5, R-<br>range=1-6 | $\Delta E_0=2.97$ , $N_{var}=10$ ,<br>$N_{ind}=20.4$ , $R=0.019$ , k-<br>range=3.0-9.5, R-<br>range=1-6 |
|--------------------------------------------------------------------------------------------------------|---------------------------------------------------------------------------------------------------------|---------------------------------------------------------------------------------------------------------|



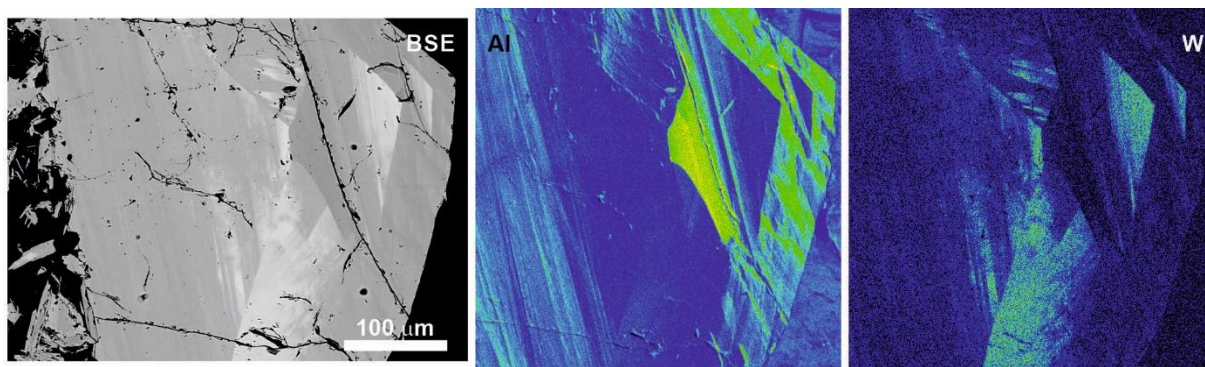

Fig. S1. Back-scattered electron (BSE) image and distribution of selected elements in one of the hematite crystals with W-enriched zones.

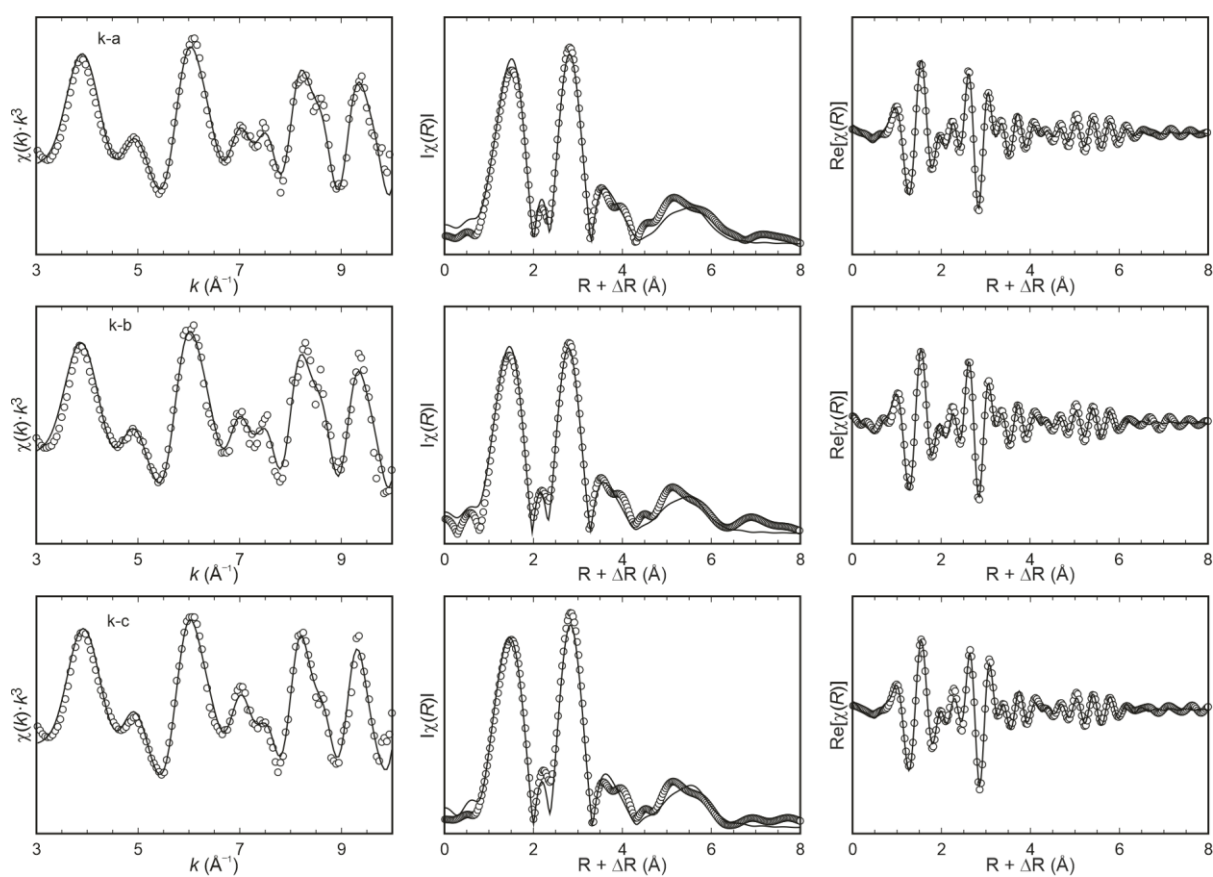

Fig. S2. The EXAFS and Fourier-transform EXAFS spectra (at the W  $L_3$  edge) of the W-rich hematite crystals A, B, and C (crystals selected for the XAS measurements). Circles represent the measured and processed data, the lines represent the fits.

### Additional information and images to the TEM investigation of W-bearing hematite

Fig. S3 shows a TEM low magnification image of the entire hematite lamella. Based on information obtained by estimation of spot SAED pattern, recorded from area with diameter 300 nm, it can be concluded that major host phase of the lamella is hematite single crystal (Fig. S3, right).

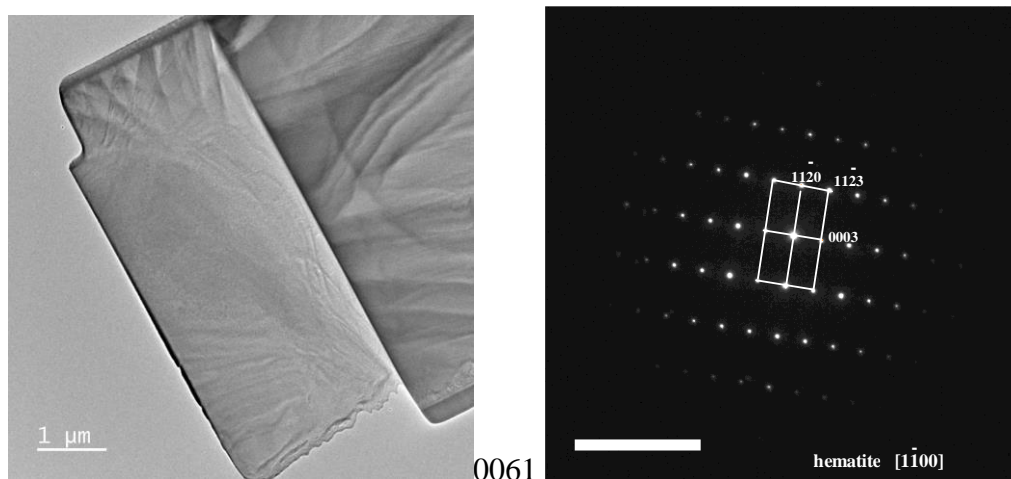

Fig. S3. (left) Low-magnification TEM image of hematite lamella. (right) SAED pattern recorded from this lamella.

Quantitative EDX analysis recorded from the entire area of lamella showed that lamella consists mainly of Fe and O, and small amount of W (60.4 at.%O, 39.3 at.%Fe, and 0.3 at.% W). Further TEM and STEM study of hematite lamella revealed the alteration of brighter and darker bands, as can be seen in Fig. S4.

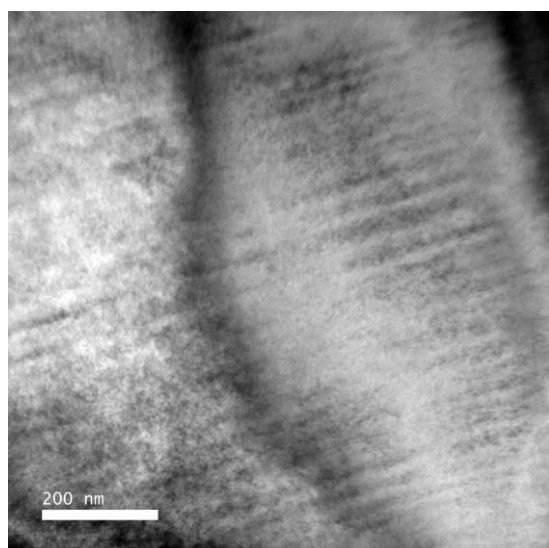

Fig. S4. Low magnification BF TEM image of compositional variation in hematite. Darker lamellae correspond to the domains with higher W content.

This indicates the W oscillatory zonation within hematite single crystal. Variation of the chemical composition was clearly confirmed by EDS spectroscopy. It is evident from comparison low magnification BF STEM image and EDS mapping that dark bands in BF STEM image corresponds to the areas with higher content of W. Higher content of W in dark zones is evident also from EDS line profile in Fig. S5. Thickness of W zones is variable and they are up to 30 nm in size. The oscillatory banding of hematite is manifested also in Fig. S4.

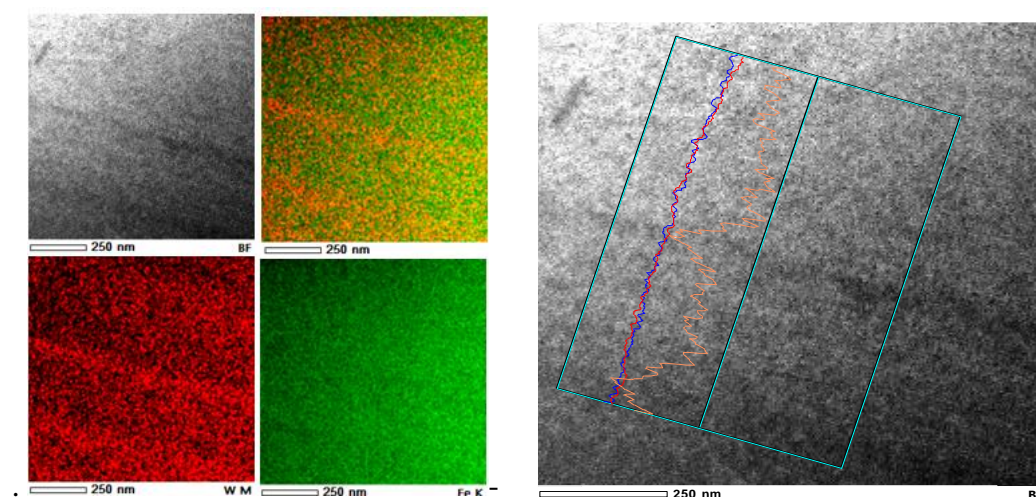

Fig. S5. (a) BF STEM, (b) overlaid W-M and Fe-K EDS maps, W-M spectroscopic map, Fe-K spectroscopic map, (c) line profile showing compositional variations of W in hematite.

Electron diffraction, HRTEM and STEM characterizations were used to determine exact phase composition of sample based on crystallography informations. HRTEM image recorded from thin region of lamella is in Fig. S6. It displays termination one of dark W-bearing band in hosted hematite. It is supposed that darker area in this image correspond to phase containing W.

By estimation of relevant FFT pattern (white motif) acquired from entire recorded area it was determined that the observed lattice spacings of 0.458 nm, 0.251 nm, and 0.220 nm correspond to the 0003,  $11\bar{2}0$ , and  $11\bar{2}3$  interplanar spacings of the hematite structure, respectively. The observed angle between the (0001) and the ( $11\bar{2}0$ ) planes is  $90.1^\circ$ , which is quite close to the theoretical value of  $90^\circ$  of hematite (PDF: 98-001-5840). The (0001), ( $11\bar{2}0$ ), and ( $11\bar{2}3$ ) crystal planes belong to  $[1\bar{1}00]$  zone axis of hematite.

Simultaneously with hematite, ferberite  $\text{FeWO}_4$  (green motif in FFT pattern in Fig. S6) was identified in this sample as well. Measured interplanar spacings of 0.34 nm, 0.57 nm, and 0.29 nm correspond to (010), (101), and (111) type planes of monoclinic  $\text{FeWO}_4$ . Observed angles between the (010) and (101) planes and (111) and (101) planes are  $90.5^\circ$  and  $31.6^\circ$ , which is close to the theoretical values of  $90^\circ$  and  $30.8^\circ$ , respectively, for ferberite (PDF: 98-001-5193). In this case, ferberite single crystal is oriented along  $[\bar{1}01]$  direction.

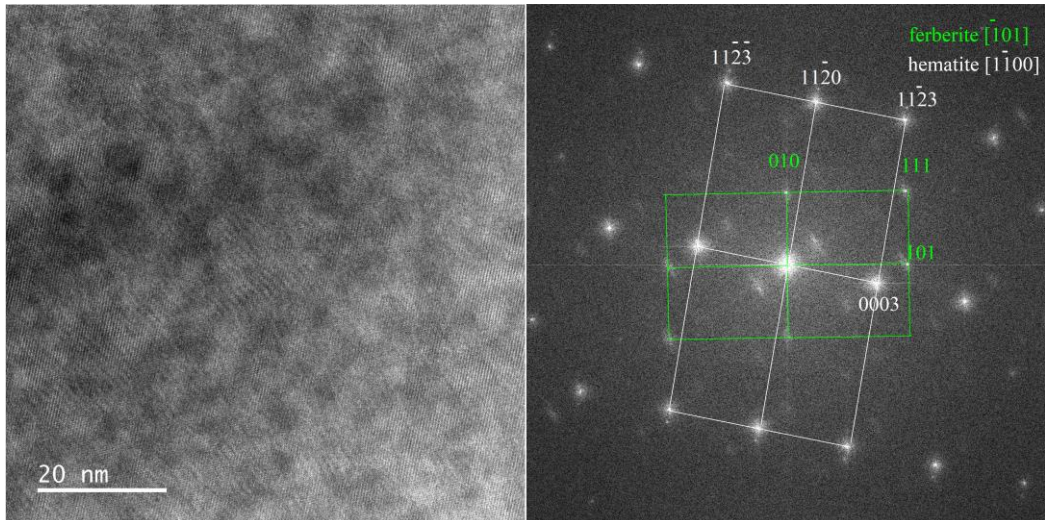

Fig. S6. (a) TEM image of dark W-bearing band in hosted hematite. (b) relevant FFT pattern

For comparison, theoretical electron diffraction patterns of hematite and ferberite single crystals oriented along identical  $[1\bar{1}00]$  and  $[\bar{1}01]$  directions, respectively, obtained using DiffGen software included in NanoMegas software package (NanoMegas, <https://www.nanomegas.com/>) are in Figs. S7a,b.

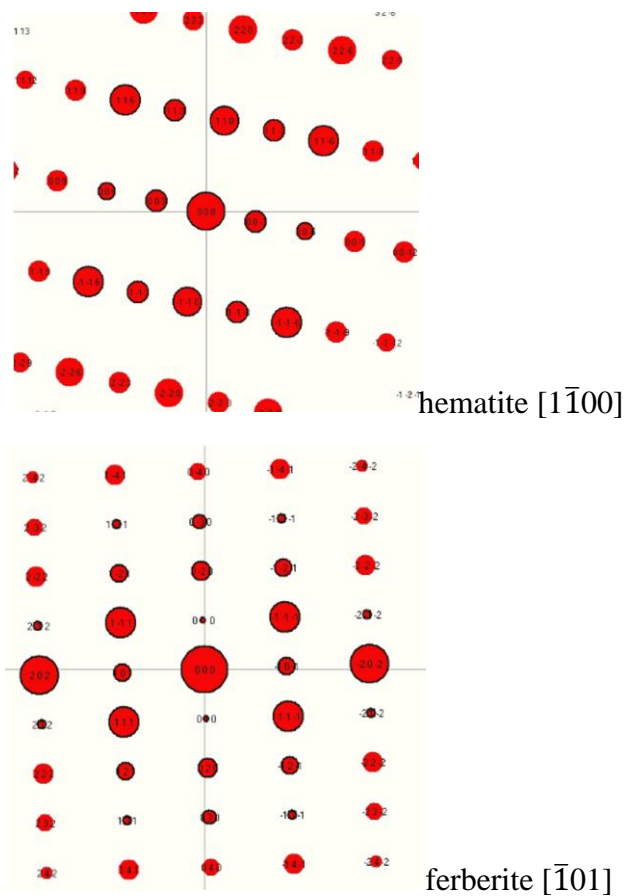

Fig. S7. Diffraction patterns simulated for (a) hematite along  $[1\bar{1}00]$  direction and (b) for ferberite in  $[\bar{1}01]$  direction.

IFFT image in Fig. S8 was obtained by masking of  $11\bar{2}0$ ,  $0003$ , and  $11\bar{2}3$  hematite reflections in respective FFT pattern, Fig. S7b. Therefore, the bright areas in Fig. S8 correspond to those regions on the experimental image contributing significantly to the intensity of the selected hematite reflections.

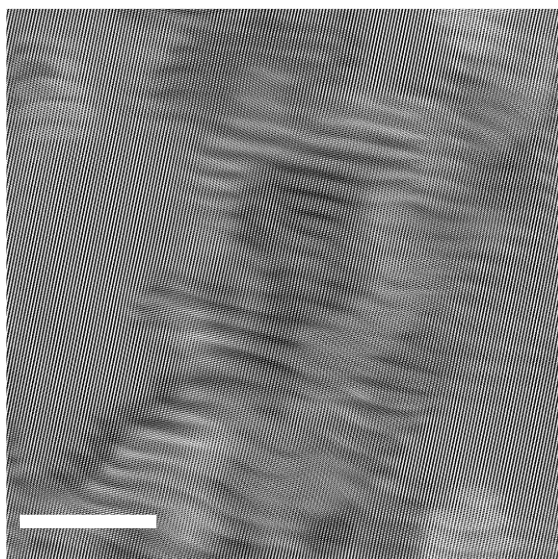

Fig. S8. IFFT image obtained by  $11\bar{2}0$ ,  $0003$ ,  $11\bar{2}3$  reflections of hematite

Moreover, in agreement with XAS spectroscopy, hematite and magnetite coexistence was revealed by HAADF STEM. An example HAADF STEM image of magnetite single crystal oriented along  $[1\bar{1}0]$  direction is Fig. S9. By evaluation of respective FFT pattern measured interplanar spacings of 0.485 nm, 0.415 nm, and 0.299 nm correspond to  $\{111\}$ ,  $\{002\}$ , and  $\{113\}$  type planes of cubic  $\text{Fe}_3\text{O}_4$ . Observed angle between the  $(001)$  and  $(111)$  planes is  $54.0^\circ$ , which is close to the theoretical value of  $54.74^\circ$  for magnetite. The determined angle  $30.0^\circ$  between  $(113)$  and  $(111)$  planes also corresponds with that theoretical  $29.5^\circ$ .

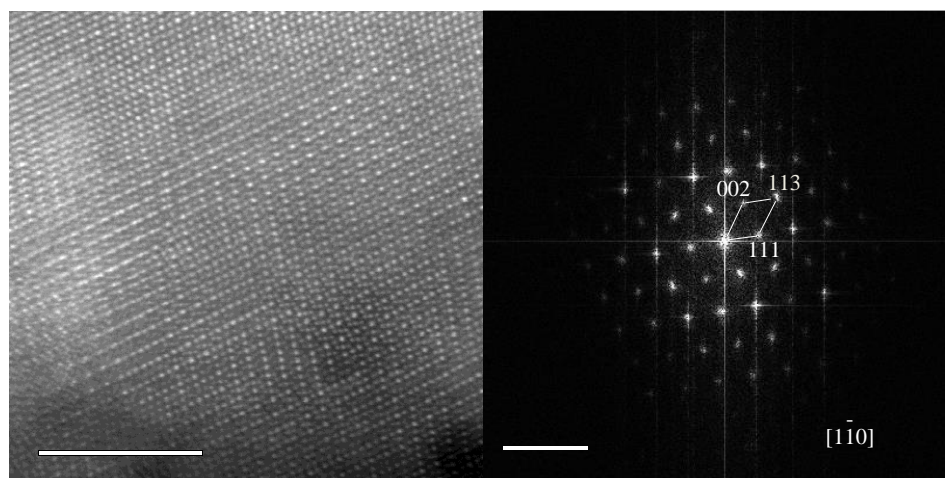

Fig. S9.  $(0143)$  HAADF STEM atomic resolution image of magnetite crystal oriented along  $[1\bar{1}0]$  direction. Bright spots are columns of Fe atoms.

More detailed HAADF and BF STEM images with atomic resolution hematite and magnetite are in Figs. S10a, b and Fig. S11a, b. They display Fe atomic column distribution along  $\langle 1\bar{1}00 \rangle$  and  $\langle 110 \rangle$  zone axis in hematite and magnetite, respectively. Since HAADF STEM images are sensitive to the atomic number of elements, bright spots in HAADF images represent columns of Fe atoms.

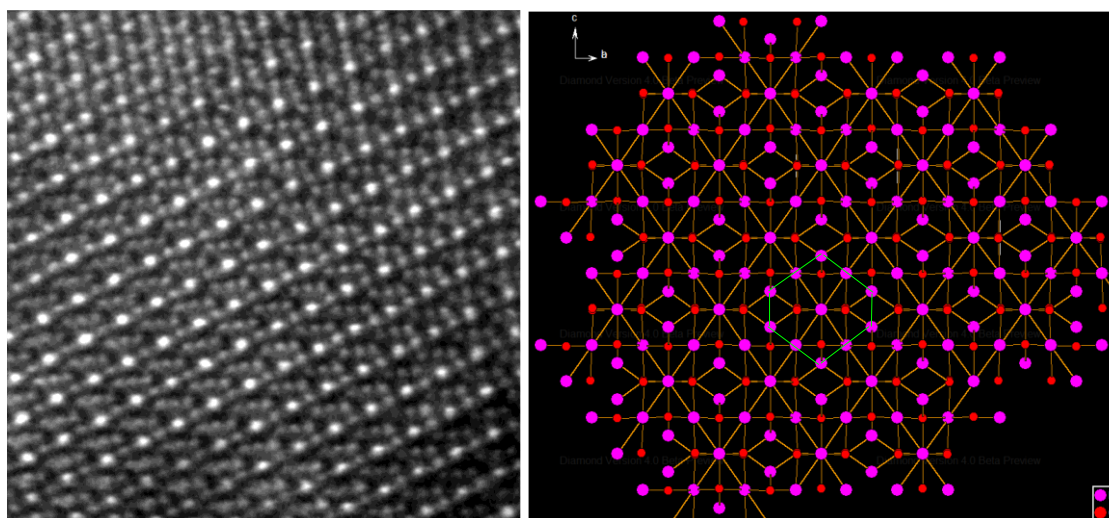

Fig. S10. (a) HAADF STEM image of magnetite along  $[1\bar{1}0]$  direction. Bright spots are columns of Fe atoms creating irregular hexagons (b) the simulation of magnetite structure oriented in  $[1\bar{1}0]$  zone axis. One of irregular Fe hexagons is marked.

More detailed atomic structure of hematite single crystal oriented in  $[1\bar{1}00]$  zone axis with respective power spectrum is in Fig. S11a, b.

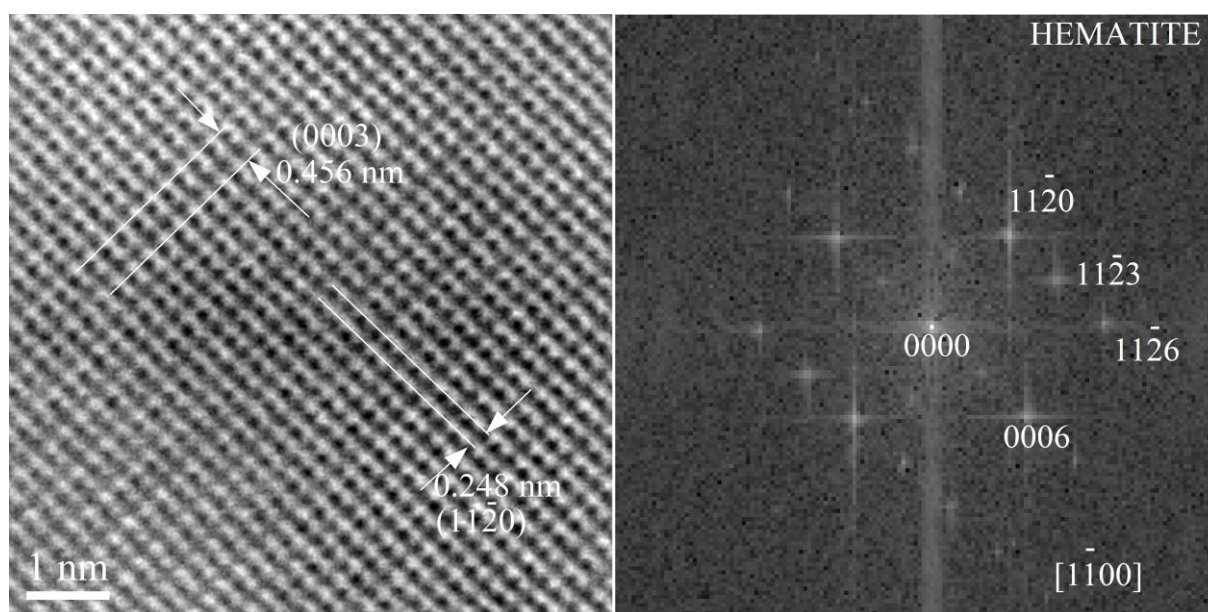

Fig. S11. (a) HAADF STEM image of hematite single crystal oriented in  $[1\bar{1}00]$  zone axis (b) power spectrum

Interface of magnetite and hematite is manifested in Fig. S12.

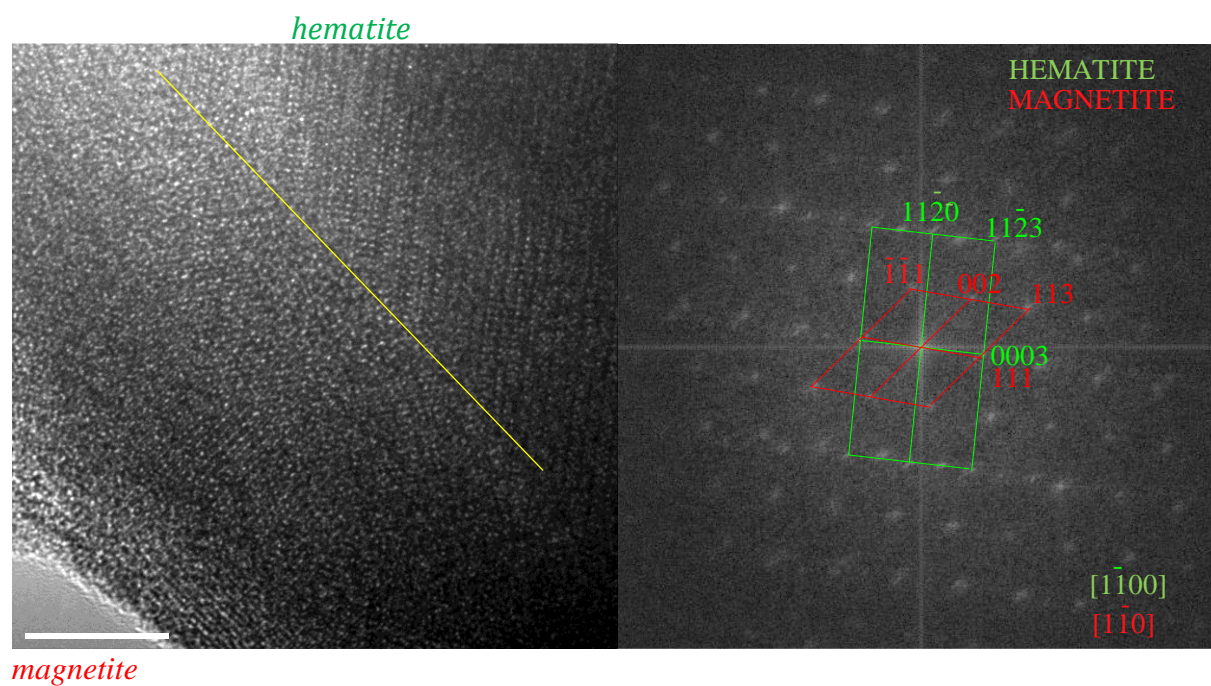

Fig. S12. (a) HRTEM of lamella near the edge. Interface of hematite and magnetite is depicted. Respective power spectrum in (b) confirms the presence hematite single crystal oriented along  $[1\bar{1}00]$  and magnetite oriented in  $[1\bar{1}0]$  directions.
